1 **Defects in autophagy lead to selective *in vivo* changes in turnover of cytosolic and**  
2 **organelle proteins in Arabidopsis**

3

4 Lei Li<sup>1,2</sup>, Chun Pong Lee<sup>2</sup>, Akila Wijerathna-Yapa<sup>2</sup>, Martyna Broda<sup>2</sup>, Marisa S. Otegui<sup>3,4</sup>, A.  
5 Harvey Millar<sup>2</sup>

6

7 1. Frontiers Science Center for Cell Responses, Department of Plant Biology and Ecology,  
8 College of Life Sciences, Nankai University, 300071 Tianjin, China.

9 2. ARC Centre of Excellence in Plant Energy Biology, School of Molecular Science, The  
10 University of Western Australia, 6009 Crawley, WA, Australia.

11 3. Department of Botany and Center for Quantitative Cell Imaging, University of  
12 Wisconsin-Madison, Madison, WI, 53706, USA.

13 4. Center for Quantitative Cell Imaging, University of Wisconsin-Madison, Madison, WI,  
14 53706, USA.

15

16

17 **Single Sentence Summary:** Protein cargo of autophagy in plants can be discovered by  
18 identifying proteins that increase in abundance and decrease in degradation rate in mutants  
19 deficient in autophagy machinery

20

21 **Keywords:** autophagy, protein degradation, mitochondrion, chloroplast, phosphate  
22 starvation

23

24 The author responsible for distribution of materials integral to the findings presented in this  
25 article is:

26

27 A. Harvey Millar

28 ARC Centre of Excellence in Plant Energy Biology, Bayliss Building M316 University of  
29 Western Australia, 35 Stirling Highway, Crawley 6009, Western Australia, Australia

30 Tel +61 8 6488 7245

31 Harvey.millar@uwa.edu.au

32

33 **Abstract**

34 Identification of autophagic protein cargo in plants by their abundance in *autophagy related*  
35 *genes (ATG)* mutants is complicated by changes in both protein synthesis and protein  
36 degradation. To detect autophagic cargo, we measured protein degradation rate in shoots  
37 and roots of *Arabidopsis atg5* and *atg11* mutant plants. These data show that less than a  
38 quarter of proteins changing in abundance are probable cargo and revealed roles of ATG11  
39 and ATG5 in degradation of specific cytosol, chloroplast and ER-resident proteins, and a  
40 specialized role for ATG11 in degradation of proteins from mitochondria and chloroplasts.  
41 Our data support a role for autophagy in degrading glycolytic enzymes and the chaperonin  
42 containing T-complex polypeptide-1 complex. Autophagy induction by Pi limitation changed  
43 metabolic profiles and the protein synthesis and degradation rates of *atg5* and *atg11* plants.  
44 A general decrease in the abundance of amino acids and increase in several secondary  
45 metabolites in autophagy mutants was consistent with altered catabolism and changes in  
46 energy conversion caused by reduced degradation rate of specific proteins. Combining  
47 measures of changes in protein abundance and degradation rates, we also identify ATG11  
48 and ATG5 associated protein cargo of low Pi induced autophagy in chloroplasts and  
49 ER-resident proteins involved in secondary metabolism.

50

## 51 **Introduction**

52 Autophagy enables cellular sugar, lipid and protein recycling and maintenance through the  
53 trafficking of cellular material into the hydrolytic environment of the vacuolar lumen.  
54 Autophagic degradation involves general and selective processes and is controlled through  
55 both autophagy related genes (ATGs) and a range of receptor recognition mechanisms (An  
56 and Harper, 2018; Marshall and Vierstra, 2018). Large protein complexes like ribosomes,  
57 proteasomes, and protein aggregates are recognized through receptors-adaptor interaction  
58 and engulfed by autophagosomes for delivery to vacuoles (Marshall et al., 2015; Floyd et al.,  
59 2016; Jung et al., 2020). Autophagic degradation is also involved in clearance of chloroplasts,  
60 mitochondria, peroxisomes, and ER during developmental transitions or stress responses  
61 (Liu et al., 2012b; Farmer et al., 2013; Li et al., 2014; Khaminets et al., 2015; Izumi et al.,  
62 2017; Zhang et al., 2020).

63

64 ATG proteins participate in autophagosome induction, membrane delivery, vesicle  
65 nucleation, cargo recognition, and phagophore expansion and closure (Marshall and Vierstra,  
66 2018). While some ATGs are encoded by single or duplicated genes in plants, there are  
67 notable exceptions like ATG8 and ATG18 which are encoded in multi-gene families  
68 (Thompson et al., 2005; Xiong et al., 2005; Yoshimoto et al., 2009a). In the multi-stage  
69 conjugation system that mediates phagophore formation, ATG8 and ATG12 are each typically  
70 conjugated to ATG7 and transferred separately to ATG3 and ATG10, respectively.  
71 Subsequently, ATG8 is covalently attached to phosphatidylethanolamine (PE) and ATG12 is  
72 attached to ATG5, forming an E3 ligase complex. The ATG5-ATG12 conjugate mainly  
73 contributes to phagophore expansion and maturation. *ATG5* mutants in Arabidopsis fail to  
74 form autophagosomes, show a general disruption in subsequent autophagy-related  
75 processes, and senesce under nitrogen- and carbon-limiting conditions (Thompson et al.,  
76 2005; Yoshimoto et al., 2009b). ATG11 is an accessory protein that aids the scaffolding of the  
77 ATG1 kinase regulatory complex to the expanding phagophore. ATG11 is reported to  
78 promote vesicle delivery to vacuoles by stabilizing the ATG1/13 complex, but does not  
79 appear to influence ATG12-ATG5 or ATG8-PE conjugates. Arabidopsis mutants deficient in

80 *ATG11* also senesce rapidly under nitrogen- and carbon-limiting conditions and fail to  
81 degrade mitochondrial proteins during dark-induced senescence (Li et al., 2014; Li and  
82 Vierstra, 2014).

83

84 The apparent accumulation of specific sets of proteins in *atg* mutant plants (Avin-Wittenberg  
85 et al., 2015; McLoughlin et al., 2018; Have et al., 2019; McLoughlin et al., 2020) may be  
86 caused directly by a failure in autophagy-dependent protein degradation, or indirectly  
87 through an increase in protein synthesis rate due to their enhanced gene expression or  
88 translation. A failure in protein degradation could also be accompanied by lower levels of  
89 protein synthesis through either feedback attenuation of gene expression or translational  
90 control. Thus, using steady-state protein abundance as sole criterion to identify autophagic  
91 protein targets is prone to errors (Wijerathna-Yapa et al., 2021). A couple of multi-omics  
92 studies surveying the effect of autophagic recycling on proteome remodeling attempted to  
93 use comparisons of mRNA and protein abundance in maize *atg12* genotypes to resolve this  
94 issue (McLoughlin et al., 2018; McLoughlin et al., 2020). These studies found that more than  
95 half of the proteins that accumulated in *atg12* plants did not have consistent changes in the  
96 abundance of their mRNA. Using a similar approach, a lack of correlation in  
97 protein-transcript changes was also observed in *atg5* plants (Have et al., 2019). In addition,  
98 differential regulation of translational rates imply that the same amount of mRNA will not  
99 always result in the same level of translation, especially in autophagy mutants in which  
100 ribosome accumulation has been reported (Gretzmeier et al., 2017; McLoughlin et al., 2018).  
101 It therefore remains an open question as to which proteins that accumulate in *atg* mutants  
102 are actual autophagy cargo and which are autophagy-related changes in protein synthesis  
103 rate.

104

105 Autophagy deficiency also leads to changes in the abundance of metabolic intermediates in  
106 plants. Metabolic profiling shows that *ATG*-deficient mutants respond differently to  
107 prolonged darkness or nutrient limitation by undergoing extensive rearrangement in primary  
108 and secondary metabolism (Masclaux-Daubresse et al., 2014; Avin-Wittenberg et al., 2015;

109 Barros et al., 2017; McLoughlin et al., 2018; Have et al., 2019; McLoughlin et al., 2020;  
110 Barros et al., 2021). These reports show that the changes in metabolic profiles and protein  
111 abundance in *atg* lines following nutrient limitation is complex, depends deeply on  
112 environmental, developmental, and tissue/organ context.

113

114 Our previous use of stable isotope progressive labelling to measure protein turnover rates in  
115 barley and Arabidopsis revealed that organelles and intra-organellar components are  
116 degraded at different rates (Nelson et al., 2014; Li et al., 2017). These rates resulted from the  
117 combined action of specific proteases in different subcellular compartments, the  
118 proteasome, and autophagy-dependent and autophagy-independent vacuolar degradation.  
119 In this study, we combined a quantitative analysis of changes in protein abundance with a  
120 stable-isotope progressive labelling strategy to measure protein degradation rates in *atg5*  
121 and *atg11* lines of Arabidopsis. Using these data, we quantified the contribution of  
122 autophagic degradation to the clearance of different organelles under control and Pi-limiting  
123 conditions. Changes in protein abundance and turnover rate provide clues to understand  
124 broad changes in metabolite levels in autophagy mutants, links between cellular trafficking  
125 and autophagic flux, and identify a range of autophagy target proteins in shoot and root  
126 tissues.

127

## 128 **Results**

129

### 130 **Arabidopsis *atg5* and *atg11* mutants do not show accelerated senescence in hydroponics** 131 **at early stages of leaf production**

132 The early onset of leaf senescence after 35 days of growth, or following bolting, is a widely  
133 reported Arabidopsis phenotype in well-studied autophagy deficient mutants, including *atg5*  
134 and *atg11* (Yoshimoto et al., 2009b; Li et al., 2014). We choose an earlier developmental  
135 stage prior to leaf senescence for our experiments to avoid senescence-associated protein  
136 abundance and degradation rate changes from dominating our analysis. After visual  
137 inspection of hydroponically grown wild type (WT) and *atg* mutant plants we decided to use

---

138 21-day-old plants for analysis as no visible signs of senescence were observed in 10 rosette  
139 leaves which resembled growth stage 1.10 plants as reported previously (Boyes et al., 2001)  
140 (**Fig S1A**). Consistent with the visible appearance of plants, the quantum efficiency of  
141 photosystem II (Fv/Fm) was the same in WT, *atg5*, and *atg11* leaves and no evidence of early  
142 senescence hot spots were observed in pulse-amplitude-modulation (PAM) fluorometry  
143 images (**Fig S1B-C**).

144

145 **Deficient autophagic flux leads to broad changes in the abundance of proteins in**  
146 **Arabidopsis roots and shoots.**

147 Changes in relative protein abundance between different genotypes and their biological  
148 replicates were measured using a  $^{15}\text{N}$  reference sample as a control. Total root or shoot  
149 proteins extracted from WT, *atg5* and *atg11* grown in  $^{14}\text{N}$  media were mixed with equal  
150 amounts of reference samples of  $^{15}\text{N}$  fully labeled WT shoot or root protein (Li et al., 2017).  
151 The combined samples were digested by trypsin and the resulting peptides fractionated and  
152 analysed by mass spectrometry. In total, 25,771 non-redundant peptides from root tissues  
153 and 18,939 peptides from shoot samples could be quantified using ratios of  $^{14}\text{N}$  sample  
154 peptides to  $^{15}\text{N}$  reference peptides. These peptides mapped to 1,265 non-redundant  
155 proteins in roots and 777 in shoots that could be quantitatively compared between WT and  
156 *atg* lines (**DataS1**). We performed pairwise comparisons between WT, *atg5* and *atg11* using  
157 protein sets that were quantified in all three biological replicates. Volcano plots showed that  
158 both autophagy mutants exhibited symmetric distributions for sets of proteins increasing or  
159 decreasing in abundance. Fold changes (FC) in protein abundance in *atg11*/WT show a  
160 relatively narrow range of FC (2-fold FC in root and 4-fold FC in shoot) compared with a wide  
161 range of FC in *atg5*/ WT protein abundance (4-fold FC in root and 8-fold FC in shoot) (**FigS2**).

162

163 To dissect the role of autophagy in protein homeostasis in different cellular compartments,  
164 we displayed the distributions of relative change in protein abundance according to the  
165 known subcellular localization of each protein (Hooper et al., 2014; Hooper et al., 2017)  
166 (**Fig1, DataS2**). Proteins located in the cytosol and peroxisomes of both shoots and roots

---

167 showed higher median abundance in *atg11* and *atg5* mutants than in WT. Conversely,  
168 proteins in the nucleus, plasma membrane, vacuoles, and those secreted to the extracellular  
169 space, showed lower median abundances in the autophagy mutants compared to WT. The  
170 majority of the 53 plastid proteins found in roots showed lower abundance in the mutants,  
171 but an overall increase of chloroplast protein abundance was observed in shoot tissue from  
172 both mutant lines (**Fig 1**). ER-resident proteins were more abundant in the root but not in  
173 shoot of the mutants. A higher abundance of mitochondrial proteins was found in both  
174 shoots and roots of *atg11*, but only in the shoot of *atg5* compared to WT.

175  
176 To further understand the role of autophagy in regulating the protein synthesis and  
177 degradation machineries, we investigated abundance changes in ribosomal and proteasomal  
178 subunits in both mutants compared to WT (**FigS3, DataS2**). For ribosomes, 70-80% of  
179 r-subunits showed a trend of higher abundance in the mutants, with 17 out of 61 r-protein  
180 in root and 2 out of 7 ribosomal r-proteins in shoot showing statistically significant increases  
181 (Student's T-test,  $P < 0.05$ ). More than half of the proteasomal subunit proteins identified also  
182 tended to be more abundant in both mutants, with 2 out of 23 proteasomal subunit proteins  
183 in root and 1 out of 6 in shoot showing statistically significant increases (Student's T-test,  
184  $P < 0.05$ ).

185  
186 **Specific proteins changed in abundance in a manner unexpected for their function or**  
187 **subcellular location in autophagy-deficient plants.**

188 To investigate specific protein abundance changes in root (**Fig S4**) and shoot (**Fig S5**),  
189 proteins with statistically significant changes in *atg5* and *atg11* were then categorized by  
190 their subcellular localizations and functions.

191  
192 In roots, the cytosolic Chaperonin Containing T-complex polypeptide-1 (CCT) protein  
193 complex subunits, ribosomal subunits, enzymes of amino acid metabolism (GAD1, ASP2,  
194 MMT and OLD3) and glycolytic enzymes accumulated in *atg11* and *atg5* (**Fig S4**). In contrast,  
195 cytoskeleton-related proteins including villins (VLN4), actin (ACT7) and tubulin

---

196 (TUB2,4,6,8,9), enzymes of amino acid metabolism (MAT3 and BCAT4), and  
197 phosphatidylinositol transfer proteins (At1g30690 and At1g72160) from the secretory  
198 pathway showed decreased abundance in both *atg11* and *atg5*. Eleven mitochondrial  
199 proteins, including components of the electron transport chain and TCA cycle, showed  
200 increases in abundance, several mitochondrial stress response proteins, such as mtHsc70-1,  
201 mtHsc70-2 and GPX6, displayed a decreased abundance in both mutants. Ten mitochondrial  
202 proteins (including ATP synthase beta subunit, CPN10, ATPHB3, TOM5 and carbonic  
203 anhydrase) showed different patterns in *atg11* and *atg5*, with their abundance typically  
204 increased in *atg11* but decreased in *atg5* (**Fig S4**). We also found that in roots, proteins  
205 involved in vesicle transport specifically accumulated in *atg5* but not in *atg11*; these proteins  
206 included clathrin heavy chain1 (At3g11130) associated with plasma membrane and Golgi,  
207 and the coatomer alpha, delta and gamma-subunits (At2g21390, At5g05010 and At4g34450)  
208 of the COP1 coat, which is required for intra Golgi-transport, retrograde transport from Golgi  
209 to ER, and Golgi maintenance. ER-resident proteins, such as AtBAG7(At5g62390), CNX1  
210 (At5g61790) and PDIL1-3(At3g54960), also show a higher abundance in *atg5* than *atg11*  
211 when compared to WT (31% in *atg5* vs 6% in *atg11*).

212

213 Different sets of proteins were quantified in shoots compared with roots due to the variation  
214 in their absolute abundance in photosynthetic and non-photosynthetic tissues. In shoots,  
215 almost half of quantified cytosolic proteins with significant changes in abundances were less  
216 abundant in mutant lines (**Fig S5**). Similar to the protein set from the roots, cytosolic  
217 ribosomal subunits, enzymes of amino acid metabolism (MAT3 and ATCIMS) and glycolytic  
218 enzymes from shoots showed increased abundance, while profilin1 and profilin2, which  
219 regulate the organization of actin cytoskeleton, showed reduced abundance in both *atg11*  
220 and *atg5*. Peptidylprolyl isomerase enzymes (FKBP12, ROC1, ROC3 and ROC5) and proteins  
221 with redox activity (TRX3, TPX1 and CSD1) showed decreased abundance in both *atg11* and  
222 *atg5* shoots. In shoots, the mitochondrial redox proteins (GPX6, PRXIIF), CPN10, and  
223 membrane-localized electron transport chain subunits showed decreased abundance while  
224 TCA cycle enzymes and matrix-localized ETC subunits accumulated in both *atg11* and *atg5*.



---

225 In chloroplasts, most stromal proteins showed increased abundance, while photosystem II  
226 (PSII) subunits, photosystem I (PSI) reaction center (PSAN), cytochrome *b<sub>6</sub>/f* (PetC),  
227 plastocyanin (DRT112 and PETE1), thioredoxins, and protein folding associated proteins  
228 were less abundant in both *atg11* and *atg5* (**Fig S5**). Most quantified shoot plastid proteins  
229 showed consistent changes in abundance in both mutant lines with few exceptions.

230

231 To determine whether these many changes in the abundance of specific root proteins were  
232 reflected in changes in the cellular architecture, we analysed the ultrastructure of root tips  
233 of 24-day-old WT, *atg5*, and *atg11* plants processed by high-pressure freezing/  
234 freeze-substitution and resin-embedding. In longitudinal sections of root tips, we identified  
235 two areas of interest, the meristematic area (up to 100 microns from the quiescent center  
236 towards the elongation zone) and the area where cells started to develop large vacuoles  
237 (between 100 and 200 microns from the quiescent center) (**Fig 2 A-C**). We imaged multiple  
238 middle sections of two roots of each genotype and measured the cell area and the area  
239 occupied by the nucleus, mitochondria, and vacuoles as well as the tonoplast length per  
240 section (**Fig 2 D-H**). We did not find statistically significant differences in any of these  
241 parameters between WT and *atg* mutants; however, there were consistent trends showing  
242 slight increase in vacuole surface and a reduction in tonoplast length/perimeter in the two  
243 *atg* mutants, in actively vacuolating cells. These results indicating that the changes in the  
244 proteome of *atg5* and *atg11*, did not induce drastic changes in the cellular organization of  
245 mutant root cells.

246

247 However, we noticed that approximately 25% of the cells in the *atg5* root tips contained  
248 abnormal Trans-Golgi networks (TGN) with largely dilated bulges or vesicles (**Fig 3 A-B**) and  
249 large concentric membranous systems (**Fig 3 C-F**). In some cases, the edges of these  
250 abnormal large membranes had bulges and budding profiles reminiscent of Golgi/TGN  
251 cisternae (**Fig 3C and D**). In some other examples, we were able to image coats assembled  
252 on budding sites on the membrane edges (**Fig 3E**, arrowheads), which is consistent with the  
253 abnormal accumulation of COP1 coatomer subunits and clathrin in *atg5*. Whereas most of

---

254 these structures seem to enclose ribosomes and cytoplasm, approximately 10% of them  
255 displayed rounded electron dense aggregates 2-3 times larger than a ribosome (**Fig 3E**).

256

257

258

259 **Autophagy deficiency changes the degradation rate of specific organelle proteins in**  
260 **Arabidopsis root and shoot**

261 To compare specific protein abundance changes with changes of specific protein  
262 degradation rates, we utilized a  $^{15}\text{N}$  progressive labelling strategy (Li et al., 2017) to quantify  
263 protein degradation rates in the three genotypes. For this, the media of hydroponically  
264 grown plants was switched from  $^{14}\text{N}$  to  $^{15}\text{N}$  nutrient salts to label newly synthesized proteins  
265 over three days, and the fraction of each peptide that was  $^{15}\text{N}$ -labelled (Labelled Peptide  
266 Fraction; LPF) was calculated using peptide mass spectrometry. In total, LPF for 11,179  
267 peptides in roots and 7,145 peptides in shoots was quantified in three biological replicates  
268 across the three genotypes. From these LPFs, the degradation rates ( $K_D$ ,  $\text{d}^{-1}$ ) of 558 root  
269 proteins and 505 shoot proteins were obtained (**Data S3**) and relative changes in  $K_D$  values  
270 were visualize by volcano plots (**Fig S6**). In roots, most proteins with slower degradation  
271 rates in *atg11* (68%) and *atg5* (82%) were located in the cytosol, followed by smaller  
272 proportions that were located in mitochondria and ER (**Table 1**). In shoots, proteins that  
273 degraded slowly were predominantly from the cytosol, chloroplasts, and mitochondria. A  
274 higher proportion of mitochondrial proteins with slower degradation rates were detected in  
275 *atg11* roots and shoots (17%, 21%) compared to *atg5* (2%, 0%). There was also a higher  
276 proportion of chloroplastic proteins with slower degradation rates in shoots of *atg11* (33%)  
277 compared to shoots of *atg5* (7%).

278

279 In roots, proteins with significant slower degradation rate in both *atg5* and *atg11* (**Fig 4**)  
280 included forty cytosolic proteins, two ER proteins (the chaperones CRT1 and CNX1), and one  
281 mitochondrial protein (ATP synthase D chain). Cytosolic proteins in this list can be broadly  
282 placed into three major functional categories: metabolism, ribosome subunits, and glycolytic

---

283 enzymes. In shoots, twelve cytosolic proteins showed slower degradation rates in both *atg5*  
284 and *atg11*. We also found proteins with slower rates of protein degradation but with  
285 statistical significance only in one of the two mutants (**Table S1**). One example from this  
286 group was RPN10, which has been reported to be an autophagy receptor for the  
287 proteasome (Marshall et al., 2015). In contrast, four mitochondrial and eight chloroplastic  
288 proteins showed very different changes in degradation rate between *atg5* and *atg11*. These  
289 proteins show slower degradation rate in *atg11*, but no change or faster rates of degradation  
290 in *atg5*. These patterns suggested a specialized role of ATG11 in mitochondrial and  
291 chloroplast protein homeostasis.

292

### 293 **Identification of ATG5 and ATG11 targets from the combined protein degradation rate and** 294 **abundance data**

295 Protein abundance and degradation rate changes were then plotted orthogonally to  
296 pinpoint probable autophagy protein targets (**Fig 5**). When *atg11* and *atg5* were compared  
297 to WT, we found that 140 and 200 root proteins and 116 and 187 shoot proteins showed  
298 significant changes in abundance and/or degradation rate (Student's T-test,  $P < 0.05$ ). The  
299 response of these proteins could be grouped into the four quadrants with different  
300 responses as explained in **Fig 5**.

301

302 Of the significantly changed proteins in roots, 80% were more abundant and slow degrading  
303 (Group 1-green) or less abundant and faster degrading (Group 2-red) (**Fig 5 A,B**). The former  
304 are potential autophagy targets, and constituted more than half of the significantly changed  
305 proteins in *atg11* but less than 20% in *atg5* (**Data S5**). These proteins are typically localized  
306 to the ER, cytosol, nucleus, peroxisomes, and mitochondria (**Fig 5C**). Furthermore, they are  
307 components of mitochondrial oxidative phosphorylation, amino acid metabolism, glycolysis,  
308 the ribosome and proteasome, TCP-1 chaperones, and protein folding and processing in the  
309 ER (**Table S1**). In comparison, most of the proteins that were degraded faster but  
310 accumulated less in the mutants (Group 2-red) were potential components of alternative  
311 and/or compensatory pathways and were localized to vacuoles, plasma membrane, plastids,

---

312 and apoplast. From these, it was apparent that the mitochondrial TCA cycle and oxidative  
313 phosphorylation proteins showed the most distinct differences between the mutants, with  
314 17 mitochondrial proteins belonging to Group 1 in *atg11* but not in *atg5*.

315

316 In shoots, only 50% of proteins that significantly changed were in Group 1 and 2, and Group  
317 1 accounted for less than 20% of proteins in both mutants (**Fig 5D, E**). In *atg11*, most of the  
318 remaining proteins were in Group 4 while in *atg5*, a higher proportion of proteins were in  
319 Group 3. Group 1 from shoots included mainly resident peroxisome, cytosolic, mitochondrial  
320 and chloroplastic proteins, with a smaller proportion of nuclear and vacuolar proteins (**Fig**  
321 **5F**). Proteins in the chloroplast showed different responses between mutant lines; ten  
322 chloroplastic proteins, including RUBISCO large subunit, fell into Group 1 in *atg11* but in  
323 Group 3 in *atg5* (**Table S2**). This again was consistent with ATG11 playing a specialized role in  
324 mitochondrial and chloroplastic protein degradation. A high proportion of proteins from  
325 shoots in Group 2 localize to plastids, vacuoles, or the apoplast (**Fig 5D,E**). The higher  
326 proportion of proteins that fell into Group 4 in shoots compared to roots (**Fig 5C,F**) suggests  
327 that protein synthesis attenuation might mask autophagy degradation in shoot tissues.

328

### 329 **Pi limitation induces autophagy and changes metabolite abundances in hydroponically** 330 **grown Arabidopsis**

331 Nitrogen, phosphate or carbon limitation are reported to activate autophagy, promote  
332 cellular content degradation in plants and lead to early senescence in autophagy mutants  
333 (Yoshimoto et al., 2009b; Avin-Wittenberg et al., 2015; Barros et al., 2017; McLoughlin et al.,  
334 2018; Naumann et al., 2019; McLoughlin et al., 2020). However, it is unclear if such  
335 conditions lead to a generic induction of autophagy or of selective autophagy of  
336 stress-related targets. Nitrogen limitation conditions would limit our ability to use a <sup>15</sup>N  
337 labelling and darkness would limit both carbon and <sup>15</sup>N incorporation into amino acids  
338 (Nelson et al., 2014). Therefore, we subjected plants to Pi starvation to investigate its effect  
339 on protein abundance and degradation rate in all three genotypes (**Fig 6**).

340

---

341 No visible phenotypic changes were observed in plants grown under Pi-limited conditions  
342 over 3 days of treatment (**Fig 6A**), although both root and shoot Pi content was significantly  
343 reduced in all genotypes (**Fig 6B**). To monitor autophagy induction and autophagic flux, we  
344 performed an imaging analysis of a line expressing *GFP-ATG8a*, which is localized to  
345 autophagic membranes and autophagosomes in root cells. Abundant GFP-ATG8a-decorated  
346 organelles were evident in the elongation zone of Pi-limited roots but not in the equivalent  
347 root zone from control plants (**Fig 6C**). In shoots, the Fv/Fm ratio remained at 0.8 in all three  
348 genotypes under control and Pi-limiting conditions (**Fig 6D**). Consistent with the reduced Pi  
349 content, the transcript of the Pi sensor *SPX1* was induced in all three genotypes when plants  
350 were grown under Pi-limiting conditions (**Fig 6E**). Autophagy associated genes, *ATG8H* and  
351 *ATG7*, were also induced under limited Pi in WT and *atg5* but not in *atg11* plants (**Fig 6E**).  
352 Extension of Pi-limited conditions to >10 days led to purple coloration of rosette leaves,  
353 indicating stress-induced anthocyanin accumulation.

354

355 To further assess the impact of Pi limitation on metabolism, we performed a mass  
356 spectrometry-based profiling of selected primary and secondary metabolites in shoots and  
357 roots both between WT and autophagy mutants and within each genotype (**Fig 7, Data S11**).

358

359 In roots, there was a drastic decrease of amino acids commonly reported to be highly  
360 responsive to nutrient limitation conditions (Araújo et al., 2011; Masclaux-Daubresse et al.,  
361 2014; Avin-Wittenberg et al., 2015; Barros et al., 2017). However, we observed very little  
362 effect on the abundance of amino acids and sugars in both mutants upon Pi limitation.  
363 Organic acids in roots generally did not change in abundance except for isocitrate and  
364 D-2-hydroxyglutarate, which were slightly more abundant in *atg11* under Pi starvation.  
365 Several glucosinolates changed in abundance in roots of autophagy mutants only under Pi  
366 limitation. Salicylic acid (SA) levels did not change in mutants under control conditions but  
367 accumulated in *atg5* under limited Pi (Fig 7), as also previously reported in dark-induced  
368 senescence (Yoshimoto et al., 2009b). Interestingly, SA-sugar conjugates, including  
369 2,3-dihydroxybenzoate glucoside 2,3-dihydroxybenzoate xyloside, and

---

370 2,5-dihydroxybenzoate xyloside accumulated in autophagy mutants under both control and  
371 Pi-limiting conditions. SA conjugation inactivates SA; the accumulation of these compounds  
372 in autophagy mutants might be part of a mechanism to partially prevent the SA-dependent  
373 early senescence typical of autophagy mutants (Yoshimoto et al., 2009b).

374

375 In shoots, the levels of amino acids alanine, threonine, serine, and phenylalanine were  
376 reduced in the mutant lines. Asparagine and aspartic acid showed some accumulation in  
377 *atg11* but not in *atg5* under both control and Pi-limiting conditions. Organic acids did not  
378 show significant changes in abundance, with the exception of fumarate, which was reduced  
379 in *atg11*, and succinate, which decreased in both autophagy mutants but only under Pi  
380 limitation. Few changes in sugar and sugar derivative abundances were present in shoots,  
381 with glucose and glucose-6-phosphate decreasing slightly in *atg11* or *atg5*, respectively. All  
382 glucosinolates, except 8-methylsulfinyloctyl glucosinolate, decreased in abundance in shoots  
383 of autophagy mutants. Consistent with the patterns seen in roots, SA-sugar conjugates in  
384 shoots were more abundant in autophagy mutants, but this accumulation was only  
385 statistically significant for 2,3-DHBX in *atg11*. Overall these profiles indicate that many of the  
386 metabolic effects of autophagy disruption are already evident under control conditions,  
387 while some of them were enhanced by Pi limitation.

388

389

390 **Pi limitation had only a mild impact on root cytosolic protein degradation in mutant lines**  
391 **and on mitochondria abundance in *atg11***

392 To determine if protein degradation rates were similarly affected by Pi limitation, we  
393 compared protein abundance for 1045 proteins and degradation rates for 476 proteins  
394 among WT, *atg5*, and *atg11* roots under both control and Pi-limiting conditions. A principal  
395 component analysis (PCA) of these datasets showed that each genotype/treatment group  
396 could be separated by protein abundance and degradation rate (**Fig 8A-B**). Low Pi increased  
397 the abundance of vacuole proteins and decreased the abundance of Golgi proteins in WT;  
398 however, the same treatment caused an increase in vacuolar proteins in *atg11* but not in

---

399 *atg5* whereas Golgi proteins were not significantly altered in either mutant (**Fig S7**). Low Pi  
400 did not induce significant changes in protein degradation rates in WT; however, it did  
401 decrease mitochondrial protein degradation rates in both *atg11* and *atg5*, and peroxisomal  
402 protein degradation rates in *atg5* (**Fig S8**).

403

404 We then expressed the root datasets as relative changes in mutants and compared them  
405 between control and Pi-limiting conditions (**Fig 8C-F**). We found that mild Pi limitation  
406 further increased mitochondrial protein abundance in *atg11* compared to WT, but not in  
407 *atg5*. Unexpectedly, Pi limitation decreased the degree of differences in degradation rates of  
408 cytosolic proteins between the mutant lines and WT (**Fig 8D,F**). This is seen in the narrower  
409 distribution of relative  $\Delta K_D$  values under Pi limited conditions. However, we found nine  
410 proteins, including five cytosolic glycolytic enzymes, Annexin 1, the glutathione transferase  
411 ATGSTF8 and the ER-localized beta-glucosylase BGLU22, with significantly faster degradation  
412 rates under Pi limitation in WT (**Fig 8G, DataS10**). Intriguingly, the faster degradation of  
413 these proteins under low Pi did not lead to a decrease in their abundance; rather, four out of  
414 nine proteins were more abundant under low Pi conditions. This pattern is consistent with  
415 induced protein synthesis as a means to compensate for faster protein degradation under Pi  
416 limitation. Faster degradation of AtGSTF8 and BGLU22 under low Pi were only detected in  
417 WT but not in the autophagy mutants (**Fig 8G, DataS10**).

418

419

420 **Pi limitation affects to degree of relative changes in abundance of chloroplast proteins in**  
421 **shoots and their degradation rates in both *atg5* and *agt11***

422 We also compared protein abundance of 782 proteins and degradation rates of 505 proteins  
423 among WT, *atg5*, and *atg11* shoots under control and Pi-limiting conditions. By applying a  
424 PCA, we found that protein abundance in WT samples could be separated from *atg5* and  
425 *atg11* under both control and Pi-limiting conditions, while *atg5* and *atg11* samples can be  
426 clearly separated under Pi limitation but not under control conditions (**Fig 9A**). In terms of  
427 protein degradation rates, WT samples could be fully separated by PCA from *atg5* and *atg11*

---

428 under low Pi, but not under control conditions (**Fig 9B**). Pi limitation led to a decrease in  
429 cytosolic protein abundance in WT and *atg11* but not in *atg5*. Chloroplastic proteins  
430 accumulated in WT under low Pi whereas under similar conditions, chloroplastic protein  
431 abundances decreased in both mutant lines (**FigS7**). Pi limitation conditions altered protein  
432 degradation rates of chloroplastic proteins only in *atg5* (**FigS8**).

433

434 As done for the root datasets, we then expressed the shoot data as relative changes in  
435 mutants to facilitate comparisons between samples grown under control and Pi-limiting  
436 conditions (**Fig9C-F**). Low Pi again led to a narrower distribution of the abundance changes  
437 of chloroplastic proteins in both mutant lines compared to WT and smaller changes of  
438 protein degradation rate for chloroplast proteins in *atg5*. Conversely in *atg11*, Pi limitation  
439 was associated with a narrower distribution of changes in cytosolic and mitochondrial  
440 protein abundance without affecting the changes in protein degradation rate. Although  
441 there was no overall change in organellar degradation rate, six shoot proteins (PSBO-1,  
442 At3g47070, thylakoid phosphoprotein-At3g47070, thioredoxin-At1g03680, PSAC, LHCA3 and  
443 plastocyanin 1) showed significantly faster degradation rates under Pi limiting conditions in  
444 WT (**Fig 9G, Data S10**). Four of them, namely PSBO-1 (PSII), thioredoxin (chloroplast stroma),  
445 PSAC (PSI), and LHCA3 (PSI) showed unchanged or slower degradation rate in *atg11* and  
446 *atg5* under low Pi. These are therefore potential ATG11 and ATG5 associated targets of  
447 induced autophagy under low Pi. Plastocyanin 1 (thylakoid) showed a slower degradation  
448 rate and significant increase in abundance in *atg11* but faster degradation in *atg5* and  
449 non-significant change in abundance, which suggests its degradation is dependent on ATG11  
450 but not ATG5. A notable exception to these trends was the thylakoid TSP9 phosphoprotein  
451 which is involved in photosystem state transition (Fristedt et al., 2009) that had an increased  
452 degradation rate but also accumulated in abundance in WT and mutant lines under low Pi,  
453 indicating its high protein synthesis rate and its turnover in all lines under Pi limitation.

454

455

456 **Discussion**



457

## 458 **Investigation of protein turnover in autophagy mutant lines**

459 Defects in autophagy can cause accumulation of autophagic protein cargo due to impaired  
460 degradation, but also lead to many changes in metabolite and transcript abundances,  
461 complicating the interpretation of cause and effect. Increase in transcript abundance may  
462 reveal up-regulation of gene expression (McLoughlin et al., 2018; McLoughlin et al., 2020),  
463 but that does not necessarily correlate with protein synthesis. In addition, estimating  
464 protein synthesis by ribosome profiling (Juntawong et al., 2014; Chotewutmontri and Barkan,  
465 2016) or newly made protein labelling strategies (Wang et al., 2016) in autophagy mutants  
466 can be misleading since ribosomes themselves are targets of autophagy (Gretzmeier et al.,  
467 2017; McLoughlin et al., 2018), **Table S2, FigS4**). Focusing on steady-state protein abundance  
468 alone in impaired autophagy mutants also fails to identify proteins that may maintain  
469 homeostasis, either by using alternative degradative pathways or reducing protein synthesis.  
470 By focusing on protein degradation rates and correlating these with protein abundance in  
471 autophagy mutants, we circumvent some of these problems to reveal subsets of proteins  
472 that are directly influenced by autophagic processes, with or without compensatory changes  
473 in protein synthesis. Similar approaches in human fibroblasts (Zhang et al., 2016) and  
474 *Drosophila melanogaster* (Vincow et al., 2019) have also pinpointed specific protein  
475 complexes and organelles that are differentially affected by autophagy in other organisms.

476

## 477 **Common changes in cytosolic protein abundance and degradation rates in *atg11* and *atg5***

478 The *ATG11* and *ATG5* mutants used in this report were previously shown to be *bona fide*  
479 single gene mutants in Arabidopsis, to have impaired autophagic fluxes detected by vacuolar  
480 delivery of *ATG8-GFP*, and to share typical early senescence phenotypes at late  
481 developmental stage and under nutrient limitation conditions (Thompson et al., 2005;  
482 Yoshimoto et al., 2009b; Li et al., 2014; Li and Vierstra, 2014). We show *atg11* and *atg5* share  
483 many common differences in cytosolic and organellar protein abundances and associated  
484 changes in protein degradation rates, although *atg5* typically showed larger relative changes  
485 in protein abundance (**Fig 1&4, Fig S4&S5**). The larger differences in *atg5* are broadly

---

486 consistent with the severity of this mutant's senescence phenotype compared with *atg11*  
487 (Yoshimoto et al., 2009b; Li et al., 2014), and the established roles of ATG5 and ATG11 in the  
488 autophagy process; namely ATG5 acting in the core conjugation cascade and ATG11 acting in  
489 a regulatory complex.

490

491 Glycolytic enzymes including phosphoglycerate kinase, enolase, triosephosphate isomerase  
492 and fructose bisphosphate aldolase showed slower protein degradation rates in both *atg11*  
493 and *atg5*, but these led to only a mild increase in abundance of these enzymes (0-24%) in  
494 autophagy mutants. Interactions between autophagy and glycolytic enzymes have been  
495 previously reported in plants and other organisms and can be complex (Han et al., 2015;  
496 Henry et al., 2015; Watson et al., 2015; Qian et al., 2017a; Qian et al., 2017b). Firstly,  
497 glycolytic enzymes play roles in autophagic flux regulation. For example,  
498 glyceraldehyde-3-phosphate dehydrogenases (GAPDHs) negatively regulate autophagy in  
499 Arabidopsis (Henry et al., 2015) and in tobacco GAPDHs can reduce autophagy activities by  
500 binding to ATG3 (Han et al., 2015). In contrast, phosphoglycerate kinase 1 (PGK1) can induce  
501 autophagy under cellular stress conditions in mammals through phosphorylating of Beclin1  
502 (Qian et al., 2017b). Secondly, autophagy can downregulate glycolysis metabolism through  
503 selective degradation of enzymes. For example, selective degradation of hexokinase (HK) in  
504 human liver cancer cells during autophagy (Jiao et al., 2017). Here we show the basal rate of  
505 degradation of glycolytic enzymes in Arabidopsis is partially due to autophagy, but impaired  
506 autophagy may be compensated for by changes in glycolytic enzyme synthesis that prevent  
507 their accumulation. Recently, proximity-dependent biotinylation screening of *in vivo*  
508 interactions confirmed GAPDH and fructose bisphosphate aldolase are bound by ATG8 in  
509 plants (Macharia et al., 2019).

510

511 The Chaperonin Containing T-complex polypeptide-1 (CCT) protein complex in human cell  
512 lines is present in immunopurified autophagosomes, degrades slowly in autophagy mutants  
513 (Dengjel et al., 2012; Zhang et al., 2016), and can restrict neuropathogenic protein  
514 aggregation via autophagy in human cell lines and fruit fly (Pavel et al., 2016). Although well

---

515 documented in animals, a 20S protein complex consisting of eight CCT subunits was only  
516 recently reported in plants (Ahn et al., 2019; McWhite et al., 2020). In this study, we found  
517 five CCT protein complex subunits (CCT1-4, 8) increased in abundance and had slower rates  
518 of degradation in roots of both autophagy mutants (**Table S1, Fig S4**), supporting the  
519 hypothesis that CCT is an autophagy target in Arabidopsis roots. CCT is known to affect the  
520 folding and stability of tubulin in Arabidopsis and mutants with deficient CCT function show  
521 depletion of cortical microtubules and reduced alpha and beta tubulin abundance due to  
522 increased degradation (Ahn et al., 2019). Interestingly, we found that five beta tubulins  
523 (TUB2,4,6,8,9) but not alpha tubulins, showed decreased abundance in *atg11* and *atg5*. It is  
524 unclear whether the decreased abundance of beta tubulin is a direct or indirect effect of  
525 impaired autophagy, but microtubules are important for autophagy. Microtubules can  
526 interact with autophagic proteins and play roles in pre-autophagosome structure, autophagy  
527 induction, formation and movement (Mackeh et al., 2013). In plants, microtubules are  
528 proposed to aid autophagosome delivery to the vacuole with the help of FYVE and  
529 coiled-coil domain-containing (FYCO) proteins that bind ATG8 and PI3K on the  
530 autophagosome outer membrane (Marshall and Vierstra, 2018). We also found actin (ACT7)  
531 and the actin-interacting proteins VILIN4 and PROFILIN1/2 showed decreased abundance in  
532 both mutants. In yeast, actin filaments are only involved in selective but not bulk autophagy  
533 (Hamasaki et al., 2005; Reggiori et al., 2005; Monastyrska et al., 2009). In mammals, actin  
534 was found to be required for both selective and bulk autophagic degradation (Kast and  
535 Dominguez, 2017; Xu et al., 2018). In plants, actin filaments seem to be dispensable for bulk  
536 autophagy in tobacco (Zheng et al., 2019), but it is unclear whether actin is needed for any  
537 form of selective autophagy in plants. Our results thus suggest that the homeostasis of the  
538 plant CCT complex is controlled by autophagic degradation and that accumulation of CCT  
539 complex subunits correlated with decreases in the abundance of components of the  
540 cytoskeleton, which warrants further investigation.

541

#### 542 **Changes in organelle abundance and degradation rates in *atg11* and *atg5***

543 Many proteins with decreased degradation rates in both root and shoot tissues of

---

544 autophagy mutants localize to the ER, peroxisomes, or mitochondria (**Fig 5**). This supports  
545 the notion that ER, peroxisome and mitochondrial proteins are autophagy cargo in both  
546 photosynthetic and non-photosynthetic tissues. Interestingly, we found that in roots, a high  
547 proportion of these proteins increased in abundance, while in shoots a high proportion  
548 decreased in abundance (**Fig 1**). This means that proteins with slower degradation showed  
549 reduced abundance in shoot but accumulated in roots, suggesting that photosynthetic  
550 tissues have more plasticity for transcription and translational control during autophagy than  
551 root tissues. The more prominent deployment of alternative proteostasis/protein recycling  
552 mechanisms in shoots than in roots is also consistent with the more drastic decrease in  
553 amino acids levels in roots than in shoots of autophagy mutants (**Fig 7**).

554

555 In roots, organelle proteins with faster degradation rates in autophagy mutants were  
556 predominantly localized to plastids, apoplast, plasma membrane, and vacuoles. Whereas we  
557 did not find evidence of increases in plastid protease abundance in roots (**Data S1**), other  
558 degradative pathways can deliver portions of plastids to the vacuole (Izumi et al., 2017;  
559 Otegui, 2018; Zhuang and Jiang, 2019). Therefore, it is possible that  
560 ATG5/ATG11-independent pathways that mediate plastid turnover are stimulated in roots of  
561 autophagy-deficient mutants. The content of extracellular, plasma membrane, and vacuolar  
562 proteins is closely associated with the rate of intracellular vesicle trafficking. Proteins reach  
563 the vacuole through the secretory and endocytic/endosomal pathways as well as through  
564 autophagy (Marty, 1999; Pereira et al., 2014; Zhang et al., 2014; Shimada et al., 2018).  
565 Deficient autophagy in *atg5* and *atg11* correlated with a decreased abundance of both  
566 tonoplast and vacuolar lumen proteins (**Fig S4, Fig S5**). The outer membrane of the  
567 autophagosome is integrated into the tonoplast upon fusion and it is therefore assumed to  
568 supply large quantities of membrane to vacuoles. Consistently, although not statistically  
569 significant, we noticed by electron microscopy a consistent decrease in tonoplast membrane  
570 in actively vacuolating cells of both *atg5* and *atg11* root cells. We also found that CLATHRIN  
571 HEAVY CHAIN 1 (CHC1, At3g11130) was more abundant in roots of *atg5* (**Fig S4**). Clathrin is  
572 associated with endocytosis at the plasma membrane and sorting at the TGN and

---

573 endosomes (Gao et al., 2019). The altered abundance of clathrin and other trafficking  
574 components could alter both endocytosis/endosomal and exocytosis rates, contributing to  
575 the fast turnover and low abundance for both plasma membrane and extracellular proteins  
576 seen here in autophagy mutants. However, future experimental evidence is still needed to  
577 investigate the endocytosis/exocytosis processes in *atg5* and other autophagy mutants.

578

### 579 **Protein abundance and degradation rate specific changes in *atg11* and *atg5***

580 The most severe molecular alterations in *atg5* were the five-fold increases in specific  
581 ER-resident proteins. This differential effect on ER homeostasis in *atg5* also correlated with  
582 accumulation of vesicle transport-associated proteins, such as three COP1 coatomers (alpha,  
583 delta and gamma subunits) in *atg5*. COP1 is essential for retrieval of proteins with di-lysine  
584 motifs from Golgi stacks back to the ER (Wang et al., 2018), intra Golgi transport, and Golgi  
585 maintenance. Interestingly, we observed in *atg5* but not in *atg11* root cells abnormal  
586 membranous structures with assembled coats of unknown nature reminiscent of Golgi  
587 and/or ER membranes (**Fig 3**). Whereas the origin of these abnormal, coated, membranous  
588 structures in *atg5* cells is unknown, the mis-regulation of COP1 components in mammalian  
589 cells induces the re-localization of Golgi, TGN, and ER markers into large membranous  
590 structures (Styers et al., 2008). The fungal toxin brefeldin A inhibits the assembly of the  
591 COP1 coat and also results in large abnormal membranous bodies (BFA bodies) in plants,  
592 that contain Golgi, TGN, and endosomal proteins (Nebenfuhr et al., 2002; Lam et al., 2009;  
593 Berson et al., 2014). In addition, the loss of COP1 subunits also leads to the accumulation  
594 of abnormal autophagosomes not fully capable to fusing with lysosomes (Razi et al., 2009).

595

596 A higher proportion of mitochondrial proteins with slower degradation rates was found in  
597 *atg11* compared with *atg5*, in both root and shoot tissues (**Table S1, S2**). Higher abundance  
598 of mitochondrial proteins was also common in both shoot and root of *atg11*, but only in  
599 shoots of *atg5* (**Fig 1**). ATG11 has been reported to be essential for senescence-induced  
600 mitophagy in Arabidopsis photosynthetic tissues (Li et al., 2014; Li and Vierstra, 2014) and  
601 ATG5-dependent mitophagy has been recently reported in Arabidopsis cotyledons and roots

---

602 (Ma et al 2021); however, *in vivo* changes in degradation rate of specific mitochondrial  
603 proteins in either *atg11* or *atg5* under control conditions has not been reported previously  
604 to our knowledge. Interestingly, although chloroplast proteins show general increases in  
605 abundance in shoots of both *atg11* and *atg5*, we only found a higher proportion of  
606 chloroplast proteins with slower degradation rates in shoots of *atg11* (**Fig 2, Table S2**). These  
607 same chloroplast proteins showed faster protein turnover rates in *atg5*. We interpret this to  
608 mean that chloroplast proteins accumulated in *atg11* through deficient degradation but  
609 through enhanced synthesis in *atg5*. Taken together, the different patterns of degradation  
610 and abundance changes in mitochondrial and chloroplastic proteins in the mutant lines  
611 support a specialized role of ATG11 in basal level mitochondrial and chloroplast protein  
612 homeostasis and highlight specific organelle proteins that are good indicators of this role.

613

614 **Pi limitation caused autophagy-dependent cytosolic protein degradation and vacuole**  
615 **biogenesis in roots, and chloroplast degradation in shoots.**

616 Pi limitation has been reported to induce autophagy in yeast and plants (Tasaki et al., 2014;  
617 Yokota et al., 2017; Naumann et al., 2019) and our data indicate we could reproduce this  
618 effect in hydroponically-grown *Arabidopsis* plants (**Fig 6**). Pi limitation-induced autophagy is  
619 reported to contribute to vacuole biogenesis (Gao et al., 2017), which is consistent with the  
620 general increase in abundance of vacuolar proteins in roots of WT plants grown in Pi-limiting  
621 conditions (**Fig S7**). A similar increase in vacuolar proteins was observed in roots of *atg11*  
622 but not of *atg5*, suggesting ATG11 is not essential for autophagy-dependent vacuole  
623 biogenesis under Pi-limiting conditions. A new ATG1-independent autophagy mechanism in  
624 prolonged carbon starvation conditions was recently reported (Huang et al., 2019), so this  
625 might explain the activation of an autophagic pathway independent of the ATG1 kinase  
626 complex in *atg11*. However, the role of ATG11 in mitochondrial degradation was not  
627 diminished under Pi limitation (**Fig 8C**), indicating that ATG1-independent autophagy in  
628 *atg11* cannot compensate for deficient mitochondria degradation. We also found that Pi  
629 limitation attenuated the cytosolic protein abundance differences observed between WT  
630 and autophagy mutants, without affecting protein degradation rates. This could indicate

631 complementary transcription/translation changes induced by Pi limitation in these  
632 autophagy mutants.

633

634 In roots, BGLU22 and ATGSTF8 had faster turnover rates under Pi limitation in WT but not in  
635 either autophagy mutant (**Fig 8G**). While BGLU22 showed a slight abundance reduction,  
636 ATGSTF8 accumulated in WT. This indicates that in WT plants growing in Pi-limiting  
637 conditions, BGLU22 turnover is associated with the stimulated autophagic degradation while  
638 ATGSTF8 increased turnover is compensated with even greater protein synthesis. BGLU22  
639 localizes to root ER bodies is an EE-type myrosinase that can break down aliphatic  
640 glucosinolates during stress conditions (Sugiyama and Hirai, 2019). The faster degradation of  
641 BGLU22 under Pi-starvation suggest that ER bodies containing BGLU22 may be delivered to  
642 the vacuoles containing the aliphatic glucosinolates by autophagy.

643

644 All six proteins that degraded faster under Pi limiting conditions in WT shoots were  
645 chloroplast-resident proteins. Four of them showed unchanged or slower degradation rate in  
646 *atg11* and *atg5* (**Fig 9G**), suggesting a role for Pi limitation in ATG11/5 associated autophagic  
647 chloroplast degradation. These unchanged or slower degrading proteins were components  
648 of photosystems and their light harvesting complexes (PSBO-1, PSAC, LHCA3), and a plastid  
649 thioredoxin (thioredoxin M1) that regulates photosynthetic acclimation in fluctuating light  
650 intensities by regulating the export of excess reductive power from the chloroplasts  
651 (Thormahlen et al., 2017). An electron carrier between photosystems (plastocyanin 1)  
652 showed slower degradation and a significant increase in abundance in *atg11* but faster  
653 degradation rate in *atg5* and no change in abundance, which suggest its degradation is  
654 dependent on ATG11 but not ATG5 (**Data S10**). These represent useful protein markers to  
655 study general or selective chloroplast degradation by autophagy.

656

657

---

658 **Methods**

659

660 *Arabidopsis hydroponic plants preparation and <sup>15</sup>N labelling*

661 *Arabidopsis thaliana* accession Columbia-0 (WT), *atg5* and *atg11* plants were grown under  
662 16/8-h light/dark conditions with cool white T8 tubular fluorescent lamps 4000K 3350 lm  
663 (Osram, Germany) with intensity of 100–125  $\mu\text{mol m}^{-2} \text{s}^{-1}$  at 22 °C. The hydroponic protocol  
664 was as described previously (Waters et al., 2012) and used a modified Hoagland solution (2  
665 mM  $\text{CaCl}_2$ , 6 mM  $\text{KNO}_3$ , 0.5 mM  $\text{NH}_4\text{NO}_3$ , 0.5 mM  $\text{MgSO}_4$ , 0.25 mM  $\text{KH}_2\text{PO}_4$ , 0.05 mM KCl  
666 and 0.04 mM Fe-EDTA) supplemented with micro elements (25  $\mu\text{M}$   $\text{H}_3\text{BO}_3$ , 2  $\mu\text{M}$   $\text{MnCl}_2$ , 2  
667  $\mu\text{M}$   $\text{ZnSO}_4$ , 0.5  $\mu\text{M}$   $\text{CuSO}_4$ , 0.15  $\mu\text{M}$   $\text{CoCl}_2$  and 0.25  $\mu\text{M}$   $(\text{NH}_4)_6\text{Mo}_7\text{O}_{24}$ ) and 2.6 mM MES, and  
668 the pH was adjusted to 5.8-6.0. Seeds of different lines (WT, *atg5* and *atg11*) were planted  
669 on the growth hole of agar stuffed in lids of 1.5-ml black tubes sitting in 24-well floater tubes  
670 racks containing 160 ml growth medium. The seeds were vernalized under 4 °C for 2-3 days  
671 before being transferred to the growth chambers. Half-strength growth medium was used  
672 for the first week. A single plant was placed in every tube lid and four tubes lids in each  
673 floater tube rack (**FigS1**). The growth medium was changed every 5 days. Unlabelled  
674 *Arabidopsis* plants were grown for 21 days until they reached leaf production stage 1.10 (T0)  
675 (Boyes et al., 2001) in natural abundance medium as noted above. To obtain a fully labeled  
676 <sup>15</sup>N protein reference standard, <sup>15</sup>N medium (with 6 mM  $\text{K}^{15}\text{NO}_3$ , 0.5 mM  $^{15}\text{NH}_4^{15}\text{NO}_3$ ) was  
677 used to replace the natural abundance nitrogen in the medium and plants were grown from  
678 seed in this medium for 26 days. For progressive <sup>15</sup>N labelling, the growth medium was  
679 discarded and the growth racks rinsed four times with fresh medium without nitrogen (no  
680  $\text{KNO}_3$  or  $\text{NH}_4\text{NO}_3$ ) to ensure the old solution was washed out. A total of 160 ml of <sup>15</sup>N  
681 medium (6 mM  $\text{K}^{15}\text{NO}_3$ , 0.5 mM  $^{15}\text{NH}_4^{15}\text{NO}_3$ ) was added for every four plants and the plants  
682 were grown for three days before collecting leaf and root tissues for separate total protein  
683 extraction (**FigS9**). Root/shoot from two plants in one rack were pooled as a biological  
684 replicate, three biological replicates were collected.

685

686 *Protein extraction, in-solution digestion, high pH HPLC separation and LC-MS analysis of*



---

687 *tryptic peptides*

688 The root/shoot samples (0.1-0.2 g) from fully  $^{15}\text{N}$  labelled reference,  $^{15}\text{N}$  progressively  
689 labeled and unlabeled of three lines (WT, *atg5* and *atg11*) were snap frozen in liquid  
690 nitrogen and homogenized using Qiagen tissue lysis beads (5 mm) by vortex. A total plant  
691 protein extraction kit (PE0230-1KT, Sigma Chemicals) was used to extract root/shoot total  
692 proteins. The final pellet of total protein was dissolved in Solution 4 and then reduced and  
693 alkylated by tributylphosphine (TBP) and iodoacetamide (IAA) as described in the Sigma  
694 manual. The suspension was centrifuged at 16,000 g for 30 min and the supernatant was  
695 assay for protein concentration by amido black quantification as described previously (Liu et  
696 al., 2012a).

697 A total of 100  $\mu\text{g}$  root/shoot proteins from progressively  $^{15}\text{N}$  labelled samples were digested  
698 in solution as described previously (Nelson et al., 2014). A total of 50  $\mu\text{g}$  of unlabeled  
699 root/leaf protein samples noted above was mixed individually with 50  $\mu\text{g}$  of the fully  
700  $^{15}\text{N}$ -labelled reference and digested in solution by trypsin. Each sample was separated into  
701 96 fractions by high pH HPLC separation and further pooled into 12 fractions and each  
702 fraction was analyzed by mass spectrometry. Filtered samples (5  $\mu\text{l}$  each) were loaded onto a  
703 C18 high-capacity nano LC chip (Agilent Technologies) using a 1200 series capillary pump  
704 (Agilent Technologies) as described previously (Li et al., 2017).

705

706 *MS data analysis, calculations of  $K_D$  and relative abundance values*

707 Agilent .d files were converted to mzML using the Msconvert package (version 2.2.2973)  
708 from the Proteowizard project, and mzML files were subsequently converted to Mascot  
709 generic files using the mzxml2 search tool from the TPPL version 4.6.2. Mascot generic file  
710 peak lists were searched against an in-house *Arabidopsis* database comprising ATH1.pep  
711 (release 10) from The *Arabidopsis* Information Resource (TAIR) and the *Arabidopsis*  
712 mitochondrial and plastid protein sets (33621 sequences; 13487170 residues) (Lamesch et  
713 al., 2012), using the Mascot search engine version 2.3 and utilizing error tolerances of 100  
714 ppm for MS and 0.5 Da for MS/MS; “Max Missed Cleavages” set to 1; variable modifications  
715 of oxidation (Met) and carbamidomethyl (Cys). We used iProphet and ProteinProphet from

716 the Trans Proteomic Pipeline (TPP) to analyze peptide and protein probability and global  
717 false discovery rate (FDR) (Nesvizhskii et al., 2003; Deutsch et al., 2010; Shteynberg et al.,  
718 2011). The reported peptide lists with  $p=0.8$  have FDRs of <3% and protein lists with  $p=0.95$   
719 have FDRs of <0.5%. Quantification of LPFs (labeled peptide fraction) were accomplished by  
720 an in-house R script which was written originally in Mathematica (Nelson et al., 2014). A  
721 median polish method described previously was used for data analysis (Li et al., 2017).  
722 Measured protein degradation rate  $0.1 \text{ d}^{-1}$  was used to calculate the FCP (fold change  
723 protein) for shoot samples. For root tissues, measured FCP based on fresh weight was  
724 measured before and after progressive  $^{15}\text{N}$  labelling. A measured degradation rate  $0.5 \text{ d}^{-1}$   
725 was determined and then applied to calculate FCP in samples of *Wt* and mutant lines, which  
726 were applied for degradation rate calculations. We determined changes in specific protein  
727 abundance using a fully labeled  $^{15}\text{N}$  protein reference standard. Protein abundance was  
728 represented as ratio to reference and normalized to all samples (three lines under both  
729 control and Pi starvation conditions) as previously reported (Li et al., 2017). Relative  
730  $\Delta\text{Abundance}$  (i.e. (mutant–*Wt*)/Average (mutant and *Wt*)) was used to describe the level of  
731 changes between mutant vs *Wt* or treatment vs control.

732

### 733 *RNA extraction and Q-PCR analysis*

734 We collected leaf 5 from all three lines at 21 days, and collected leaf 6 after three days Pi  
735 starvation treatment. The shoot samples (~0.1g) from three lines (*Wt*, *atg5* and *atg11*)  
736 under control/Pi starvation conditions were snap frozen in liquid nitrogen and homogenized  
737 to powder using Qiagen tissue lysis beads (2 mm) by a homogenizer. RNA was extracted  
738 using Spectrum<sup>TM</sup> Plant Total RNA kit (Sigma-Aldrich, STRN250-1KT) with On-Column DNase  
739 treatment (Sigma-Aldrich, DNASE70) following manufacturer's instructions. 500ng of RNA  
740 was used for cDNA synthesis with iScript cDNA synthesis kit (Bio-rad, 1708890). Transcripts  
741 of *spx1* (*F*- TGCCGCCTCTACAGTTAAATGGC, *R*-TGGCTTCTTGCTCCAACAATGG), *atg8h*  
742 (*F*-TGCAGTTAGATCCATCCAAAGCTC, *R*-TCCATGCGACTAGCGGTTTGTAG) and *atg7*  
743 (*F*-ACGTGGTTGCACCTCAGGATTC, *R*- ACTAAGAGTTCAACGGCGAGAGC) were quantified  
744 using QuantiNova SYBR green PCR kit (Qiagen, 208056) with LightCycler380 in *Wt*, *atg5/11*

---

745 lines under both control and Pi starvation conditions. We did four biological replicates for  
746 most samples except *atg11* post starvation treatment. QPCR data were normalized to  
747 housekeeping genes *AKT2* (F- *GGTAACATTGTGCTCAGTGGTGG*,  
748 *R-AACGACCTTAATCTTCATGCTGC*) and *UBQ10*(F-*CTGCGACTCAGGGAATCTTCTA*,  
749 *R-TTGTGCCATTGAATTGAACCC*) before analysed using geometric averaging of multiple  
750 control genes (Vandesompele et al., 2002; Czechowski et al., 2005) before being compared.

751

#### 752 *Pi concentration measurement by a colorimetric assay*

753 *Wt*, *atg5* and *atg11* lines were grown hydroponically till leaf production stage 1.10 (T0).  
754 Growth containers were rinsed with water for complete phosphate depletion. For Pi  
755 starvation treatment, plant growth media was replaced with Hoagland solution without  
756 phosphate and grown for three days (T3-Pi starvation). Hoagland solution with phosphate  
757 was used for control plants (T3). Inorganic concentration in root/shoot tissues of three lines  
758 were measured by a colorimetric assay. Inorganic phosphate was extracted in 500 µl water  
759 from 10-mg frozen powdered samples. The concentration of P<sub>i</sub> was determined  
760 spectrophotometrically at 820 nm after a 90-min reaction at 37°C in the presence of 1.4%  
761 w/v ascorbate and 0.36% w/v ammonium molybdate in 1 N H<sub>2</sub>SO<sub>4</sub> (Ames, 1966).

762

#### 763 *Maximum quantum yield of PSII measurement by IMAGING-PAM*

764 Leaf production stage 1.10 Arabidopsis plants (T0-grown in hydroponics for ~21 days  
765 post-germination) were washed by Hoagland media without phosphate and then grown for  
766 another three days in fresh growth media (T3-control) or growth media without phosphate  
767 (T3-phosphate starvation). Whole plants were dark adapted least 20 mins before being  
768 measured by a MAXI version of the IMAGING-PAM. A color gradient was used to  
769 demonstrate the Fv/Fm (maximum quantum yield of PSII) values which were measured by  
770 IMAGING-PAM in leaves of the whole rosette. One biological replicate was a combination of  
771 measured Fv/Fm values in six leaves in two Arabidopsis plants.

772

#### 773 *Confocal laser scanning microscopy*

774 GFP-ATG8a plants were grown hydroponically till leaf production stage 1.10. Whole plants  
775 were transferred into normal or -Pi growth media and grown for another three days. E64d  
776 was supplemented into growth media 24 hours before the confocal laser scanning  
777 microscopy experiment to a final concentration of 100  $\mu$ M. A Nikon A1Si confocal  
778 microscope equipped with laser line 488-nm excitation and emission band-pass filter of  
779 500-520 nm, and controlled by a NIS element AR software package (version 4.13.01, Build  
780 916) was used. Images were acquired using a 20x lens (Nikon CFI Plan Apo VC 20x 0.75 N.A.)  
781 with pinhole diameter of 2.5 airy units (corresponds to the optical slice of 4.37  $\mu$ m).  
782 Autophagic puncta (AP) of representative images were counted by the 'Analyze Particles'  
783 function of ImageJ. AP numbers in each Z-stack were plotted. The distribution of AP number  
784 under control and Pi limitation conditions in the representative image were compared by  
785 Kolmogorov-Smirnov test for significance.

786

#### 787 *Transmission electron microscopy*

788 Arabidopsis seedlings were grown for 24 days in hydroponic conditions as described above.  
789 Root tips were excised and placed in freezing planchettes containing 0.1M sucrose and  
790 high-pressure frozen in a Baltec HPM 010. Samples were high-pressure frozen in 2% (w/v)  
791 OsO<sub>4</sub> in anhydrous acetone in dry ice overnight and warmed to room temperature on a  
792 rocker with slow agitation for several hours, until they reached at room temperature. After  
793 several acetone rinses and the planchets removed, samples were infiltrated in a series of  
794 Epon resin changes polymerizing at 60°C for 24 h. Sections were stained with 2% uranyl  
795 acetate and lead citrate (2.6% lead nitrate and 3.5% sodium citrate, pH 12) and imaged in a  
796 Philips CM120 transmission electron microscope. Morphological measurements were done  
797 using FIJI (Schindelin et al., 2012).

798

#### 799 *Metabolite Extraction*

800 Plant tissues (15–50 mg) were collected at specified time points and immediately  
801 snap-frozen in liquid nitrogen. Samples were ground to fine powder and 500  $\mu$ l of cold  
802 metabolite extraction solution (90% [v/v] methanol, spiked with 2 mg/ml ribitol, 6 mg/ml

---

803 adipic acid, and 2 mg/ml and <sup>13</sup>C-leucine as internal standards). Samples were immediately  
804 vortexed and shaken at 1,400 rpm for 20 min at 75°C. Cell debris was removed by  
805 centrifugation at 20,000 x g for 5 minutes. For each sample, 100 or 400 µl of supernatant  
806 was transferred to a new tube and either proceeded to derivatization for LC-MS analysis or  
807 dried using a SpeedVac.

808

809 *Analyses of salicylic acid, organic acids and amino acids by selective reaction monitoring*  
810 *using triple quadrupole (QQQ) mass spectrometry*

811 For LC-MS analysis of organic acids, sample derivatization was carried out based on  
812 previously published methods with modifications (Han et al., 2013). Briefly, for each of 100  
813 µL of sample, 50 µL of 250 mM 3-nitrophenylhydrazine in 50% methanol, 50 µL of 150 mM  
814 1-ethyl-3-(3-dimethylaminopropyl) carbodiimide in methanol, and 50 µL of 7.5% pyridine in  
815 75% methanol were mixed and allowed to react on ice for 60 minutes. To terminate the  
816 reaction, 50 µL of 2 mg/mL butylated-hydroxytoluene in methanol was added, followed by  
817 the addition of 700 µL of water. Derivatized organic acids were separated on a Phenomenex  
818 Kinetex XB-C18 column (50 x 2.1mm, 5µm particle size) using 0.1% formic acid in water  
819 (solvent A) and methanol with 0.1% formic acid (solvent B) as the mobile phase. The elution  
820 gradient was 18% B at 1 min, 90% B at 10 min, 100% B at 11 min, 100% B at 12 min, 18% B at  
821 13 min and 18% B at 20 min. The column flow rate was 0.3 mL/min and the column  
822 temperature was maintained at 40 °C. The QQQ-MS was operated in the negative ion mode  
823 with multiple reaction monitoring (MRM) mode.

824

825 For measuring salicylic acid and amino acids, dried samples were resuspended in 100 µL  
826 HPLC-grade water before they were filtered to remove insoluble debris. Metabolites were  
827 separated on an Agilent Poroshell 120 Bonus-BP column (100 x 2.1 mm, 2.7µm internal  
828 diameter) using 0.1% formic acid in water (solvent A) and acetonitrile with 0.1% formic acid  
829 (solvent B) as the mobile phase. For the analysis of amino acids and sugars, the elution  
830 gradient was 0% B at 1 min, 1% B at 4 min, 10% B at 6 min, 100% B at 6.5 min, 100% B at 8  
831 min, 0% B at 8.5 min and 0% B at 15 min. The column flow rate was 0.25 mL/min, the

---

832 column temperature was kept at 40 °C. The QQQ-MS was operated in the positive ion mode  
833 with MRM mode. For salicylic acid, the elution gradient was 0% B at 1 min, 1% B at 3 min, 95%  
834 B at 23 min, 100% B at 23.2 min, 100% B at 25 min, 0% B at 25.5 min and 0% B at 34 min.  
835 The column flow rate was 0.20 mL/min and the column temperature was set to 40 °C. The  
836 LC-MS was operated in the negative ion mode with MRM mode.

837  
838 A 0.5 µL or a 15 µL aliquot of each sample were injected and analysed by an Agilent 1100  
839 HPLC system coupled to an Agilent 6430 Triple Quadrupole (QQQ) mass spectrometer  
840 equipped with an electrospray ion source. Data acquisition and LC-MS control were done  
841 using the Agilent MassHunter Data Acquisition software (version B06.00 Build 6.0.6025.4).  
842 The autosampler was kept at 10°C. The QQQ-MS was operated in MRM mode using the  
843 following operation settings: capillary voltage, 4000V; drying N<sub>2</sub> gas and temperature, 11  
844 L/min and 125 °C respectively; Nebulizer, 15 psi. All optimised MRM transitions for each  
845 target were listed in **Data S12**. All data was analysed using MassHunter Quantitative Analysis  
846 Software (version B.07.01, Build 7.1.524.0). Metabolites were quantified by comparing the  
847 integrated peak area with a calibration curve obtained using authentic standards, and  
848 normalised against fresh weight and internal standards.

849  
850 *Measurement and identification of sugars and secondary metabolites by*  
851 *quadrupole/time-of-flight mass (Q-TOF) spectrometry*

852 Analyses of sugars and secondary metabolites were performed using an Agilent 1100 HPLC  
853 system coupled to an Agilent 6510 Quadrupole/Time-of-Flight (Q-TOF) mass spectrometer  
854 equipped with an electrospray ion source. Data acquisition and LC-MS control were carried  
855 out using the Agilent MassHunter Data Acquisition software (version B02.00). Separation of  
856 metabolites was performed using a Luna C18 column (Phenomenex; 150 × 2 mm, 3 µm  
857 particle size). The mobile phase consisted of 97:3 water:methanol with 10 mM tributylamine  
858 and 15 mM acetic acid (solvent A) and 100% methanol (solvent B). The gradient program  
859 was 0% B 0 min, 1% B 5 min, 5% B 15 min, 10% B 22 min, 15% B 23 min, 24% B 25 min, 29%  
860 B 80 min, 95% B 81 min, 95% B 82 min, 0% B 83 min and 0% B 97min. The flow rate was 0.2

---

861 mL/min, with column temperature kept at 35°C and samples at 10°C. The Q-TOF was  
862 operated in MS mode with negative ion polarity using the following operation settings:  
863 capillary voltage, 4000V; drying N<sub>2</sub> gas and temperature, 10 L/min and 250 °C respectively;  
864 Nebulizer, 30 psi. Fragmentor, skimmer and octopole radio frequency (Oct1 RF Vpp) voltages  
865 were set to 110V, 65V and 750V respectively. The scan range was 70-1200 m/z and spectra  
866 were collected at 4.4 spectra/s which corresponded to 2148 transients/spectrum. All MS  
867 scan data was analysed using MassHunter Quantitative Analysis Software (version B.07.01,  
868 Build 7.1.524.0). Peaks were normalised against sample weight and the internal standard.  
869 For identification of metabolites without authentic standards, Q-TOF was operated in  
870 Targeted MS/MS mode with negative ion polarity using the same MS settings as outlined  
871 above. The MS/MS scan range was 40-1000 m/z and spectra were collected at 3.7 spectra/s  
872 which corresponded to 2603 transients/spectra. For each metabolite target, the retention  
873 time window was set to ±1 min, isolation width was set to narrow (~1.3 m/z), 10- to 20- and  
874 40-eV collision energies were used and the acquisition time was set to 180 ms/spectra. The  
875 identity of each unknown was verified by comparing MS/MS fragment ions with published  
876 data (Stobiecki et al., 2006; Lee et al., 2008; Rochfort et al., 2008; Matsuda et al., 2009;  
877 Bartsch et al., 2010; Bialecki et al., 2010; Zhang et al., 2013; Lin et al., 2014; Hohner et al.,  
878 2018). The expected m/z, retention time and the method for identification were listed in

879 **DataS12.**

880

881 **Open accessible data:**

882 PRIDE Project Name: To investigate the role of autophagy in Arabidopsis root cellular protein  
883 turnover and proteostasis (15N Spike-in root)

884 Project accession: PXD010992

885 PRIDE Project Name: To investigate the role of autophagy in Arabidopsis shoot cellular  
886 protein turnover and proteostasis (15N Spike-in shoot)

887 Project accession: PXD010948

888 PRIDE Project Name: To investigate the role of autophagy in Arabidopsis root cellular protein  
889 turnover and proteostasis

890 Project accession: PXD010900

891 PRIDE Project Name: To investigate the role of autophagy in Arabidopsis shoot cellular  
892 protein turnover and proteostasis

893 Project accession: PXD010932

894

### 895 **Acknowledgements**

896 *atg5-1* (SAIL\_129\_B07), *atg11-1* (SAIL\_1166\_G10) and the *GFP-ATG8a* line were kindly  
897 provided by Professor Richard Vierstra, Washington University, St Louis, MO. We thank Julio  
898 Paez-Valencia for his assistance growing plants for transmission electron microscopy analysis  
899 and Zhirui Chen for her assistance for confocal image quantifications.

900

### 901 **Author Contribution**

902 LL and AHM designed the research; CPL, AWY and MB performed plant culture and  
903 biochemical experiments; MSO performed and analyzed TEM data. Mass spectrometry and  
904 analysis was performed by LL. LL, AHM and MSO contributing to the writing and revision  
905 of the article.

906

907

### 908 **Funding**

909 This work was supported through funding by the Australian Research Council (CE140100008,  
910 DP180104136) to AHM, National Natural Science Foundation of China (31970294) to LL and  
911 NSF IOS-1840687 grant to MSO.

912

### 913 **Competing Interests**

914 The Authors declare that there are no competing interests associated with the manuscript.

915

916



917

918 **References**

919

920 Ahn, H.K., Yoon, J.T., Choi, I., Kim, S., Lee, H.S., and Pai, H.S. (2019). Functional  
921 characterization of chaperonin containing T-complex polypeptide-1 and its conserved  
922 and novel substrates in Arabidopsis. *Journal of experimental botany* 70, 2741-2757.

923 Ames, B.N. (1966). [10] Assay of inorganic phosphate, total phosphate and phosphatases. In  
924 *Methods in Enzymology* (Academic Press), pp. 115-118.

925 An, H., and Harper, J.W. (2018). Systematic analysis of ribophagy in human cells reveals  
926 bystander flux during selective autophagy. *Nat Cell Biol* 20, 135-143.

927 Araújo, W.L., Tohge, T., Ishizaki, K., Leaver, C.J., and Fernie, A.R. (2011). Protein degradation –  
928 an alternative respiratory substrate for stressed plants. *Trends Plant Sci*.

929 Avin-Wittenberg, T., Bajdzienko, K., Wittenberg, G., Alseekh, S., Tohge, T., Bock, R., Giavalisco,  
930 P., and Fernie, A.R. (2015). Global analysis of the role of autophagy in cellular  
931 metabolism and energy homeostasis in Arabidopsis seedlings under carbon  
932 starvation. *The Plant cell* 27, 306-322.

933 Barros, J.A.S., Cavalcanti, J.H.F., Medeiros, D.B., Nunes-Nesi, A., Avin-Wittenberg, T., Fernie,  
934 A.R., and Araujo, W.L. (2017). Autophagy Deficiency Compromises Alternative  
935 Pathways of Respiration following Energy Deprivation in Arabidopsis thaliana. *Plant*  
936 *physiology* 175, 62-76.

937 Barros, J.A.S., Magen, S., Lapidot-Cohen, T., Rosental, L., Brotman, Y., Araujo, W.L., and  
938 Avin-Wittenberg, T. (2021). Autophagy is required for lipid homeostasis during  
939 dark-induced senescence. *Plant physiology*.

940 Bartsch, M., Bednarek, P., Vivancos, P.D., Schneider, B., von Roepenack-Lahaye, E., Foyer, C.H.,  
941 Kombrink, E., Scheel, D., and Parker, J.E. (2010). Accumulation of  
942 Isochorismate-derived 2,3-Dihydroxybenzoic 3-O-beta-D-Xyloside in Arabidopsis  
943 Resistance to Pathogens and Ageing of Leaves. *Journal of Biological Chemistry* 285,  
944 25654-25665.

945 Berson, T., von Wangenheim, D., Takac, T., Samajova, O., Rosero, A., Ovecka, M., Komis, G.,  
946 Stelzer, E.H., and Samaj, J. (2014). Trans-Golgi network localized small GTPase  
947 RabA1d is involved in cell plate formation and oscillatory root hair growth. *BMC Plant*  
948 *Biol* 14, 252.

949 Bialecki, J.B., Ruzicka, J., Weisbecker, C.S., Haribal, M., and Attygalle, A.B. (2010).  
950 Collision-induced dissociation mass spectra of glucosinolate anions. *J Mass Spectrom*  
951 45, 272-283.

952 Boyes, D.C., Zayed, A.M., Ascenzi, R., McCaskill, A.J., Hoffman, N.E., Davis, K.R., and Gorch,  
953 J. (2001). Growth stage-based phenotypic analysis of Arabidopsis: a model for high  
954 throughput functional genomics in plants. *The Plant cell* 13, 1499-1510.

955 Chotewutmontri, P., and Barkan, A. (2016). Dynamics of Chloroplast Translation during  
956 Chloroplast Differentiation in Maize. *PLoS Genet* 12, e1006106.

957 Czechowski, T., Stitt, M., Altmann, T., Udvardi, M.K., and Scheible, W.R. (2005). Genome-wide  
958 identification and testing of superior reference genes for transcript normalization in  
959 Arabidopsis. *Plant physiology* 139, 5-17.

960 Dengjel, J., Høyer-Hansen, M., Nielsen, M.O., Eisenberg, T., Harder, L.M., Schandorff, S.,

- 961 Farkas, T., Kirkegaard, T., Becker, A.C., Schroeder, S., Vanselow, K., Lundberg, E.,  
962 Nielsen, M.M., Kristensen, A.R., Akimov, V., Bunkenborg, J., Madeo, F., Jäätelä, M.,  
963 and Andersen, J.S. (2012). Identification of Autophagosome-associated Proteins and  
964 Regulators by Quantitative Proteomic Analysis and Genetic Screens. *Mol Cell*  
965 *Proteomics* 11.
- 966 Deutsch, E.W., Mendoza, L., Shteynberg, D., Farrah, T., Lam, H., Tasman, N., Sun, Z., Nilsson,  
967 E., Pratt, B., Prazen, B., Eng, J.K., Martin, D.B., Nesvizhskii, A.I., and Aebersold, R.  
968 (2010). A guided tour of the Trans-Proteomic Pipeline. *Proteomics* 10, 1150-1159.
- 969 Farmer, L.M., Rinaldi, M.A., Young, P.G., Danan, C.H., Burkhart, S.E., and Bartel, B. (2013).  
970 Disrupting autophagy restores peroxisome function to an Arabidopsis lon2 mutant  
971 and reveals a role for the LON2 protease in peroxisomal matrix protein degradation.  
972 *The Plant cell* 25, 4085-4100.
- 973 Floyd, B.E., Morriss, S.C., MacIntosh, G.C., and Bassham, D.C. (2016). Evidence for  
974 autophagy-dependent pathways of rRNA turnover in Arabidopsis. *Autophagy* 11,  
975 2199-2212.
- 976 Gao, C., Zhuang, X., Shen, J., and Jiang, L. (2017). Plant ESCRT Complexes: Moving Beyond  
977 Endosomal Sorting. *Trends Plant Sci* 22, 986-998.
- 978 Gao, J., Chaudhary, A., Vaddepalli, P., Nagel, M.K., Isono, E., and Schneitz, K. (2019). The  
979 Arabidopsis receptor kinase STRUBBELIG undergoes clathrin-dependent endocytosis.  
980 *Journal of experimental botany* 70, 3881-3894.
- 981 Gretzmeier, C., Eiselein, S., Johnson, G.R., Engelke, R., Nowag, H., Zarei, M., Kuttner, V.,  
982 Becker, A.C., Rigbolt, K.T.G., Hoyer-Hansen, M., Andersen, J.S., Munz, C., Murphy, R.F.,  
983 and Dengjel, J. (2017). Degradation of protein translation machinery by amino acid  
984 starvation-induced macroautophagy. *Autophagy* 13, 1064-1075.
- 985 Hamasaki, M., Noda, T., Baba, M., and Ohsumi, Y. (2005). Starvation triggers the delivery of  
986 the endoplasmic reticulum to the vacuole via autophagy in yeast. *Traffic* 6, 56-65.
- 987 Han, J., Gagnon, S., Eckle, T., and Borchers, C.H. (2013). Metabolomic analysis of key central  
988 carbon metabolism carboxylic acids as their 3-nitrophenylhydrazones by  
989 UPLC/ESI-MS. *Electrophoresis* 34, 2891-2900.
- 990 Han, S., Wang, Y., Zheng, X., Jia, Q., Zhao, J., Bai, F., Hong, Y., and Liu, Y. (2015). Cytoplasmic  
991 Glyceraldehyde-3-Phosphate Dehydrogenases Interact with ATG3 to Negatively  
992 Regulate Autophagy and Immunity in *Nicotiana benthamiana*. *The Plant cell* 27,  
993 1316-1331.
- 994 Have, M., Luo, J., Tellier, F., Balliau, T., Cueff, G., Chardon, F., Zivy, M., Rajjou, L., Cacas, J.L.,  
995 and Masclaux-Daubresse, C. (2019). Proteomic and lipidomic analyses of the  
996 Arabidopsis atg5 autophagy mutant reveal major changes in endoplasmic reticulum  
997 and peroxisome metabolisms and in lipid composition. *New Phytol* 223, 1461-1477.
- 998 Henry, E., Fung, N., Liu, J., Drakakaki, G., and Coaker, G. (2015). Beyond glycolysis: GAPDHs  
999 are multi-functional enzymes involved in regulation of ROS, autophagy, and plant  
1000 immune responses. *PLoS Genet* 11, e1005199.
- 1001 Hohner, R., Marques, J.V., Ito, T., Amakura, Y., Budgeon, A.D., Jr., Weitz, K., Hixson, K.K., Davin,  
1002 L.B., Kirchhoff, H., and Lewis, N.G. (2018). Reduced Arogenate Dehydratase  
1003 Expression: Ramifications for Photosynthesis and Metabolism. *Plant physiology* 177,  
1004 115-131.

- 
- 1005 Hooper, C.M., Castleden, I.R., Tanz, S.K., Aryamanesh, N., and Millar, A.H. (2017). SUBA4: the  
1006 interactive data analysis centre for Arabidopsis subcellular protein locations. *Nucleic  
1007 Acids Research* 45, D1064-D1074.
- 1008 Hooper, C.M., Tanz, S.K., Castleden, I.R., Vacher, M.A., Small, I.D., and Millar, A.H. (2014).  
1009 SUBAcon: a consensus algorithm for unifying the subcellular localization data of the  
1010 Arabidopsis proteome. *Bioinformatics* 30, 3356-3364.
- 1011 Huang, X., Zheng, C., Liu, F., Yang, C., Zheng, P., Lu, X., Tian, J., Chung, T., Otegui, M.S., Xiao, S.,  
1012 Gao, C., Vierstra, R.D., and Li, F. (2019). Genetic Analyses of the Arabidopsis ATG1  
1013 Kinase Complex Reveal Both Kinase-Dependent and Independent Autophagic Routes  
1014 during Fixed-Carbon Starvation. *The Plant cell* 31, 2973-2995.
- 1015 Izumi, M., Ishida, H., Nakamura, S., and Hidema, J. (2017). Entire Photodamaged  
1016 Chloroplasts Are Transported to the Central Vacuole by Autophagy. *The Plant cell* 29,  
1017 377-394.
- 1018 Jiao, L., Zhang, H.L., Li, D.D., Yang, K.L., Tang, J., Li, X., Ji, J., Yu, Y., Wu, R.Y., Ravichandran, S.,  
1019 Liu, J.J., Feng, G.K., Chen, M.S., Zeng, Y.X., Deng, R., and Zhu, X.F. (2017). Regulation  
1020 of Glycolytic Metabolism by Autophagy in Liver Cancer Involves Selective Autophagic  
1021 Degradation of HK2 (hexokinase 2). *Autophagy*, 0.
- 1022 Jung, H., Lee, H.N., Marshall, R.S., Lomax, A.W., Yoon, M.J., Kim, J., Kim, J.H., Vierstra, R.D.,  
1023 Chung, T., and Bozhkov, P. (2020). Arabidopsis cargo receptor NBR1 mediates  
1024 selective autophagy of defective proteins. *Journal of experimental botany* 71, 73-89.
- 1025 Juntawong, P., Girke, T., Bazin, J., and Bailey-Serres, J. (2014). Translational dynamics  
1026 revealed by genome-wide profiling of ribosome footprints in Arabidopsis.  
1027 *Proceedings of the National Academy of Sciences of the United States of America*  
1028 111, E203-212.
- 1029 Kast, D.J., and Dominguez, R. (2017). The Cytoskeleton–Autophagy Connection. *Current  
1030 Biology* 27, R318-R326.
- 1031 Khaminets, A., Heinrich, T., Mari, M., Grumati, P., Huebner, A.K., Akutsu, M., Liebmann, L.,  
1032 Stolz, A., Nietzsche, S., Koch, N., Mauthe, M., Katona, I., Qualmann, B., Weis, J.,  
1033 Reggiori, F., Kurth, I., Hubner, C.A., and Dikic, I. (2015). Regulation of endoplasmic  
1034 reticulum turnover by selective autophagy. *Nature* 522, 354-358.
- 1035 Lam, S.K., Cai, Y., Tse, Y.C., Wang, J., Law, A.H., Pimpl, P., Chan, H.Y., Xia, J., and Jiang, L. (2009).  
1036 BFA-induced compartments from the Golgi apparatus and trans-Golgi network/early  
1037 endosome are distinct in plant cells. *Plant J* 60, 865-881.
- 1038 Lamesch, P., Berardini, T.Z., Li, D., Swarbreck, D., Wilks, C., Sasidharan, R., Muller, R., Dreher,  
1039 K., Alexander, D.L., Garcia-Hernandez, M., Karthikeyan, A.S., Lee, C.H., Nelson, W.D.,  
1040 Ploetz, L., Singh, S., Wensel, A., and Huala, E. (2012). The Arabidopsis Information  
1041 Resource (TAIR): improved gene annotation and new tools. *Nucleic Acids Res* 40,  
1042 D1202-1210.
- 1043 Lee, K.C., Chan, W., Liang, Z.T., Liu, N., Zhao, Z.Z., Lee, A.W.M., and Cai, Z.W. (2008). Rapid  
1044 screening method for intact glucosinolates in Chinese medicinal herbs by using liquid  
1045 chromatography coupled with electrospray ionization ion trap mass spectrometry in  
1046 negative ion mode. *Rapid Commun Mass Sp* 22, 2825-2834.
- 1047 Li, F.Q., and Vierstra, R.D. (2014). Arabidopsis ATG11, a scaffold that links the ATG1-ATG13  
1048 kinase complex to general autophagy and selective mitophagy. *Autophagy* 10,

- 1049 1466-1467.
- 1050 Li, F.Q., Chung, T., and Vierstra, R.D. (2014). AUTOPHAGY-RELATED11 Plays a Critical Role in  
1051 General Autophagy- and Senescence-Induced Mitophagy in Arabidopsis. *The Plant*  
1052 *cell* 26, 788-807.
- 1053 Li, L., Nelson, C.J., Trosch, J., Castleden, I., Huang, S., and Millar, A.H. (2017). Protein  
1054 Degradation Rate in Arabidopsis thaliana Leaf Growth and Development. *Plant Cell*  
1055 29, 207-228.
- 1056 Lin, L.Z., Sun, J.H., Chen, P., Zhang, R.W., Fan, X.E., Li, L.W., and Harnly, J.M. (2014). Profiling  
1057 of Glucosinolates and Flavonoids in *Rorippa indica* (Linn.) Hiern. (Cruciferae) by  
1058 UHPLC-PDA-ESI/HRMSn. *J Agr Food Chem* 62, 6118-6129.
- 1059 Liu, L., Feng, D., Chen, G., Chen, M., Zheng, Q., Song, P., Ma, Q., Zhu, C., Wang, R., Qi, W.,  
1060 Huang, L., Xue, P., Li, B., Wang, X., Jin, H., Wang, J., Yang, F., Liu, P., Zhu, Y., Sui, S., and  
1061 Chen, Q. (2012a). Mitochondrial outer-membrane protein FUNDC1 mediates  
1062 hypoxia-induced mitophagy in mammalian cells. *Nat Cell Biol* 14, 177-185.
- 1063 Liu, Y., Burgos, J.S., Deng, Y., Srivastava, R., Howell, S.H., and Bassham, D.C. (2012b).  
1064 Degradation of the endoplasmic reticulum by autophagy during endoplasmic  
1065 reticulum stress in Arabidopsis. *The Plant cell* 24, 4635-4651.
- 1066 Macharia, M.W., Tan, W.Y.Z., Das, P.P., Naqvi, N.I., and Wong, S.M. (2019).  
1067 Proximity-dependent biotinylation screening identifies NbHYPK as a novel interacting  
1068 partner of ATG8 in plants. *BMC Plant Biol* 19, 326.
- 1069 Mackeh, R., Perdiz, D., Lorin, S., Codogno, P., and Pous, C. (2013). Autophagy and  
1070 microtubules - new story, old players. *J Cell Sci* 126, 1071-1080.
- 1071 Marshall, R.S., and Vierstra, R.D. (2018). Autophagy: The Master of Bulk and Selective  
1072 Recycling. *Annu Rev Plant Biol* 69, 173-208.
- 1073 Marshall, R.S., Li, F., Gemperline, D.C., Book, A.J., and Vierstra, R.D. (2015). Autophagic  
1074 Degradation of the 26S Proteasome Is Mediated by the Dual ATG8/Ubiquitin  
1075 Receptor RPN10 in Arabidopsis. *Molecular cell* 58, 1053-1066.
- 1076 Marty, F. (1999). Plant vacuoles. *The Plant cell* 11, 587-600.
- 1077 Masclaux-Daubresse, C., Clement, G., Anne, P., Routaboul, J.M., Guiboileau, A., Soulay, F.,  
1078 Shirasu, K., and Yoshimoto, K. (2014). Stitching together the Multiple Dimensions of  
1079 Autophagy Using Metabolomics and Transcriptomics Reveals Impacts on Metabolism,  
1080 Development, and Plant Responses to the Environment in Arabidopsis. *The Plant cell*  
1081 26, 1857-1877.
- 1082 Matsuda, F., Yonekura-Sakakibara, K., Niida, R., Kuromori, T., Shinozaki, K., and Saito, K.  
1083 (2009). MS/MS spectral tag-based annotation of non-targeted profile of plant  
1084 secondary metabolites. *Plant Journal* 57, 555-577.
- 1085 McLoughlin, F., Augustine, R.C., Marshall, R.S., Li, F., Kirkpatrick, L.D., Otegui, M.S., and  
1086 Vierstra, R.D. (2018). Maize multi-omics reveal roles for autophagic recycling in  
1087 proteome remodelling and lipid turnover. *Nat Plants*.
- 1088 McLoughlin, F., Marshall, R.S., Ding, X., Chatt, E.C., Kirkpatrick, L.D., Augustine, R.C., Li, F.,  
1089 Otegui, M.S., and Vierstra, R.D. (2020). Autophagy Plays Prominent Roles in Amino  
1090 Acid, Nucleotide, and Carbohydrate Metabolism during Fixed-Carbon Starvation in  
1091 Maize. *The Plant cell* 32, 2699-2724.
- 1092 McWhite, C.D., Papoulas, O., Drew, K., Cox, R.M., June, V., Dong, O.X., Kwon, T., Wan, C.,

- 1093 Salmi, M.L., Roux, S.J., Browning, K.S., Chen, Z.J., Ronald, P.C., and Marcotte, E.M.  
1094 (2020). A Pan-plant Protein Complex Map Reveals Deep Conservation and Novel  
1095 Assemblies. *Cell* 181, 460-474.e414.
- 1096 Monastyrska, I., Rieter, E., Klionsky, D.J., and Reggiori, F. (2009). Multiple roles of the  
1097 cytoskeleton in autophagy. *Biol Rev Camb Philos Soc* 84, 431-448.
- 1098 Naumann, C., Muller, J., Sakhonwasee, S., Wiegghaus, A., Hause, G., Heisters, M.,  
1099 Burstenbinder, K., and Abel, S. (2019). The Local Phosphate Deficiency Response  
1100 Activates Endoplasmic Reticulum Stress-Dependent Autophagy. *Plant physiology* 179,  
1101 460-476.
- 1102 Nebenfuhr, A., Ritzenthaler, C., and Robinson, D.G. (2002). Brefeldin A: deciphering an  
1103 enigmatic inhibitor of secretion. *Plant physiology* 130, 1102-1108.
- 1104 Nelson, C.J., Alexova, R., Jacoby, R.P., and Millar, A.H. (2014). Proteins with high turnover rate  
1105 in barley leaves estimated by proteome analysis combined with in planta isotope  
1106 labeling. *Plant physiology* 166, 91-108.
- 1107 Nesvizhskii, A.I., Keller, A., Kolker, E., and Aebersold, R. (2003). A statistical model for  
1108 identifying proteins by tandem mass spectrometry. *Anal Chem* 75, 4646-4658.
- 1109 Otegui, M.S. (2018). Vacuolar degradation of chloroplast components: autophagy and  
1110 beyond. *Journal of experimental botany* 69, 741-750.
- 1111 Pavel, M., Imarisio, S., Menzies, F.M., Jimenez-Sanchez, M., Siddiqi, F.H., Wu, X., Renna, M.,  
1112 O'Kane, C.J., Crowther, D.C., and Rubinsztein, D.C. (2016). CCT complex restricts  
1113 neuropathogenic protein aggregation via autophagy. *Nature communications* 7,  
1114 13821.
- 1115 Pereira, C., Pereira, S., and Pissarra, J. (2014). Delivering of proteins to the plant vacuole--an  
1116 update. *Int J Mol Sci* 15, 7611-7623.
- 1117 Qian, X., Li, X., and Lu, Z. (2017a). Protein kinase activity of the glycolytic enzyme PGK1  
1118 regulates autophagy to promote tumorigenesis. *Autophagy* 13, 1246-1247.
- 1119 Qian, X., Li, X.J., Cai, Q.S., Zhang, C.B., Yu, Q.J., Jiang, Y.H., Lee, J.H., Hawke, D., Wang, Y.G.,  
1120 Xia, Y., Zheng, Y., Jiang, B.H., Liu, D.X., Jiang, T., and Lu, Z.M. (2017b).  
1121 Phosphoglycerate Kinase 1 Phosphorylates Beclin1 to Induce Autophagy. *Molecular*  
1122 *cell* 65, 917-+.
- 1123 Razi, M., Chan, E.Y., and Tooze, S.A. (2009). Early endosomes and endosomal coatome are  
1124 required for autophagy. *J Cell Biol* 185, 305-321.
- 1125 Reggiori, F., Monastyrska, I., Shintani, T., and Klionsky, D.J. (2005). The actin cytoskeleton is  
1126 required for selective types of autophagy, but not nonspecific autophagy, in the yeast  
1127 *Saccharomyces cerevisiae*. *Mol Biol Cell* 16, 5843-5856.
- 1128 Rochfort, S.J., Trenerry, V.C., Imsic, M., Panozzo, J., and Jones, R. (2008). Class targeted  
1129 metabolomics: ESI ion trap screening methods for glucosinolates based on MSn  
1130 fragmentation. *Phytochemistry* 69, 1671-1679.
- 1131 Schindelin, J., Arganda-Carreras, I., Frise, E., Kaynig, V., Longair, M., Pietzsch, T., Preibisch, S.,  
1132 Rueden, C., Saalfeld, S., Schmid, B., Tinevez, J.Y., White, D.J., Hartenstein, V., Eliceiri,  
1133 K., Tomancak, P., and Cardona, A. (2012). Fiji: an open-source platform for  
1134 biological-image analysis. *Nat Methods* 9, 676-682.
- 1135 Shimada, T., Takagi, J., Ichino, T., Shirakawa, M., and Hara-Nishimura, I. (2018). Plant  
1136 Vacuoles. *Annu Rev Plant Biol* 69, 123-145.

- 
- 1137 Shteynberg, D., Deutsch, E.W., Lam, H., Eng, J.K., Sun, Z., Tasman, N., Mendoza, L., Moritz,  
1138 R.L., Aebersold, R., and Nesvizhskii, A.I. (2011). iProphet: multi-level integrative  
1139 analysis of shotgun proteomic data improves peptide and protein identification rates  
1140 and error estimates. *Molecular & cellular proteomics* : MCP 10, M111 007690.
- 1141 Stobiecki, M., Skirycz, A., Kerhoas, L., Kachlicki, P., Muth, D., Einhorn, J., and Mueller-Roeber,  
1142 B. (2006). Profiling of phenolic glycosidic conjugates in leaves of *Arabidopsis thaliana*  
1143 using LC/MS. *Metabolomics* 2, 197-219.
- 1144 Styers, M.L., O'Connor, A.K., Grabski, R., Cormet-Boyaka, E., and Sztul, E. (2008). Depletion of  
1145 beta-COP reveals a role for COP-I in compartmentalization of secretory  
1146 compartments and in biosynthetic transport of caveolin-1. *Am J Physiol Cell Physiol*  
1147 294, C1485-1498.
- 1148 Sugiyama, R., and Hirai, M.Y. (2019). Atypical Myrosinase as a Mediator of Glucosinolate  
1149 Functions in Plants. *Frontiers in plant science* 10.
- 1150 Tasaki, M., Asatsuma, S., and Matsuoka, K. (2014). Monitoring protein turnover during  
1151 phosphate starvation-dependent autophagic degradation using a photoconvertible  
1152 fluorescent protein aggregate in tobacco BY-2 cells. *Frontiers in plant science* 5, 172.
- 1153 Thompson, A.R., Doelling, J.H., Suttangkakul, A., and Vierstra, R.D. (2005). Autophagic  
1154 nutrient recycling in *Arabidopsis* directed by the ATG8 and ATG12 conjugation  
1155 pathways. *Plant physiology* 138, 2097-2110.
- 1156 Thormahlen, I., Zupok, A., Rescher, J., Leger, J., Weissenberger, S., Groysman, J., Orwat, A.,  
1157 Chatel-Innocenti, G., Issakidis-Bourguet, E., Armbruster, U., and Geigenberger, P.  
1158 (2017). Thioredoxins Play a Crucial Role in Dynamic Acclimation of Photosynthesis in  
1159 Fluctuating Light. *Mol Plant* 10, 168-182.
- 1160 Vandesompele, J., De Preter, K., Pattyn, F., Poppe, B., Van Roy, N., De Paepe, A., and  
1161 Speleman, F. (2002). Accurate normalization of real-time quantitative RT-PCR data by  
1162 geometric averaging of multiple internal control genes. *Genome Biol* 3,  
1163 RESEARCH0034.
- 1164 Vincow, E.S., Thomas, R.E., Merrihew, G.E., Shulman, N.J., Bammler, T.K., MacDonald, J.W.,  
1165 MacCoss, M.J., and Pallanck, L.J. (2019). Autophagy accounts for approximately  
1166 one-third of mitochondrial protein turnover and is protein selective. *Autophagy* 15,  
1167 1592-1605.
- 1168 Wang, J., Zhang, J., Lee, Y.M., Koh, P.L., Ng, S., Bao, F., Lin, Q., and Shen, H.M. (2016).  
1169 Quantitative chemical proteomics profiling of de novo protein synthesis during  
1170 starvation-mediated autophagy. *Autophagy* 12, 1931-1944.
- 1171 Wang, S., Xie, K., Xu, G., Zhou, H., Guo, Q., Wu, J., Liao, Z., Liu, N., Wang, Y., and Liu, Y. (2018).  
1172 Plant G proteins interact with endoplasmic reticulum luminal protein receptors to  
1173 regulate endoplasmic reticulum retrieval. *J Integr Plant Biol* 60, 541-561.
- 1174 Waters, M.T., Nelson, D.C., Scaffidi, A., Flematti, G.R., Sun, Y.K., Dixon, K.W., and Smith, S.M.  
1175 (2012). Specialisation within the DWARF14 protein family confers distinct responses  
1176 to karrikins and strigolactones in *Arabidopsis*. *Development* 139, 1285-1295.
- 1177 Watson, A.S., Riffelmacher, T., Stranks, A., Williams, O., De Boer, J., Cain, K., MacFarlane, M.,  
1178 McGouran, J., Kessler, B., Khandwala, S., Chowdhury, O., Puleston, D., Phadwal, K.,  
1179 Mortensen, M., Ferguson, D., Soilleux, E., Woll, P., Jacobsen, S.E., and Simon, A.K.  
1180 (2015). Autophagy limits proliferation and glycolytic metabolism in acute myeloid

- 
- 1181 leukemia. *Cell Death Discov* 1.
- 1182 Wijerathna-Yapa, A., Stroehrer, E., Fenske, R., Li, L., Duncan, O., and Millar, A.H. (2021).
- 1183 Proteomics for Autophagy Receptor and Cargo Identification in Plants. *J Proteome*
- 1184 *Res* 20, 129-138.
- 1185 Xiong, Y., Contento, A.L., and Bassham, D.C. (2005). AtATG18a is required for the formation
- 1186 of autophagosomes during nutrient stress and senescence in *Arabidopsis thaliana*.
- 1187 *Plant J* 42, 535-546.
- 1188 Xu, J., Kozlov, G., McPherson, P.S., and Gehring, K. (2018). A PH-like domain of the Rab12
- 1189 guanine nucleotide exchange factor DENND3 binds actin and is required for
- 1190 autophagy. *J Biol Chem* 293, 4566-4574.
- 1191 Yokota, H., Gomi, K., and Shintani, T. (2017). Induction of autophagy by phosphate starvation
- 1192 in an Atg11-dependent manner in *Saccharomyces cerevisiae*. *Biochem Biophys Res*
- 1193 *Commun* 483, 522-527.
- 1194 Yoshimoto, K., Ishida, H., Wada, S., Ohsumi, Y., and Shirasu, K. (2009a). The role of plant
- 1195 autophagy in nutrient starvation and aging. *Autophagy* 5, 904-904.
- 1196 Yoshimoto, K., Jikumaru, Y., Kamiya, Y., Kusano, M., Consonni, C., Panstruga, R., Ohsumi, Y.,
- 1197 and Shirasu, K. (2009b). Autophagy negatively regulates cell death by controlling
- 1198 NPR1-dependent salicylic acid signaling during senescence and the innate immune
- 1199 response in *Arabidopsis*. *The Plant cell* 21, 2914-2927.
- 1200 Zhang, C., Hicks, G.R., and Raikhel, N.V. (2014). Plant vacuole morphology and vacuolar
- 1201 trafficking. *Frontiers in plant science* 5.
- 1202 Zhang, K., Halitschke, R., Yin, C., Liu, C.J., and Gan, S.S. (2013). Salicylic acid 3-hydroxylase
- 1203 regulates *Arabidopsis* leaf longevity by mediating salicylic acid catabolism. *Proc Natl*
- 1204 *Acad Sci U S A* 110, 14807-14812.
- 1205 Zhang, T., Shen, S., Qu, J., and Ghaemmaghami, S. (2016). Global Analysis of Cellular Protein
- 1206 Flux Quantifies the Selectivity of Basal Autophagy. *Cell Reports* 14, 2426-2439.
- 1207 Zhang, X., Ding, X., Marshall, R.S., Paez-Valencia, J., Lacey, P., Vierstra, R.D., and Otegui, M.S.
- 1208 (2020). Reticulon proteins modulate autophagy of the endoplasmic reticulum in
- 1209 maize endosperm. *Elife* 9.
- 1210 Zheng, X., Wu, M., Li, X., Cao, J., Li, J., Wang, J., Huang, S., Liu, Y., and Wang, Y. (2019). Actin
- 1211 filaments are dispensable for bulk autophagy in plants. *Autophagy* 15, 2126-2141.
- 1212 Zhuang, X., and Jiang, L. (2019). Chloroplast Degradation: Multiple Routes Into the Vacuole.
- 1213 *Frontiers in plant science* 10, 359.
- 1214

1215 **Figure Legends**

1216 **Fig 1. Changes in abundance of proteins in *atg5* and *atg11* that are resident in different**  
1217 **subcellular locations.** Box plots of relative changes in abundance of 241 root (A) and 265  
1218 shoot (B) proteins from *atg5* and *atg11* which significantly changed in abundance in  
1219 comparison with WT ( $p < 0.05$ ). These were from the larger set of 1114 root and 698 shoot  
1220 proteins that were quantified in all genotypes.  $\Delta$ Abundance changes of specific root and  
1221 shoot proteins are shown in **Fig S2** and **Fig S3**. Numbers of significantly changing (x) and total  
1222 quantified (y) proteins for each subcellular location (x/y) are shown. A comparison of  
1223 k-samples distributions (Kruskal-Wallis) was performed in XLSTAT to evaluate the level of  
1224 changes in subcellular locations. Changes in abundance of proteins in root can be divided  
1225 into A-G groups with increasing values. Changes in abundance of proteins in shoot can be  
1226 only divided into A group. An explanation of values defining each group would be important.

1227  
1228 **Fig 2. Transmission electron microscopy analysis of WT, *atg5*, and *atg11* root cells.** (A)  
1229 Longitudinal section of a WT root showing the areas selected for analysis: meristem region  
1230 (up to 100  $\mu$ m from quiescent center; QC) and the adjacent area up to 200  $\mu$ m from the QC  
1231 where cells are actively developing vacuoles. Asterisks indicate examples of cells that were  
1232 analyzed. (B) Cell with developing vacuoles (C) Meristematic cells; D-E Quantification of  
1233 vacuolated cell area per section (D), nuclear area in meristematic cells (E), mitochondrial and  
1234 vacuolar area per section of vacuolated cells (F,G) and length of tonoplast per section of  
1235 vacuolated cells (H). Between 10 and 13 cells from two roots of each genotype were used for  
1236 this analysis. M, mitochondria; N, nucleus; V, vacuole. Scales bars= 10  $\mu$ m in (A); 2  $\mu$ m in  
1237 (B,C).

1238  
1239 **Fig 3. Abnormal organelles in *atg5* root cells.** (A) Golgi stack in WT cells. (B) Golgi stack and  
1240 associated TGN with dilated vesicle profiles (asterisks) in *atg5*. (C)-(F) Large membranous  
1241 structures with concentric membranes in *atg5*. Some of these structures displayed budding  
1242 profiles at their edges (asterisks in C). Budding sites with assembled coats (E, asterisks) are  
1243 commonly seen on these structures. Enclosed by these membranes, there are electron  
1244 dense aggregates 2-3 times larger than a cytosolic ribosomes (E and inset). G, Golgi stack; M,  
1245 mitochondrion. Scale bars= 200 nm (A,B, E); 400 nm (C,D); 500 nm (F).

1246  
1247 **Fig 4. Specific proteins that degrade more slowly in *atg5* and *atg11* roots and shoots**  
1248 **compared with wild-type *Arabidopsis*.** (A) A heatmap of 43 root proteins with significant  
1249 slower degradation rate (relative  $\Delta K_D$ ) in both *atg5* and *atg11*. (B) A heatmap of 31 shoot  
1250 proteins with significant slower  $\Delta K_D$  in *atg5* or *atg11*. Proteins with significance differences  
1251 in both *atg5* and *atg11* and shown in bold font. Proteins are group according to the top  
1252 three functional categories in root and top 3 organelles in shoot tissues. Specific protein  
1253 degradation rates in WT, *atg5* and *atg11* can be found in Data S3.

1254  
1255 **Fig 5. Combination of changes in abundance and degradation rate for proteins in *atg5* and**  
1256 ***atg11* from different cellular compartments.** Matching sets of protein degradation rate  
1257 changes (Relative  $\Delta KD$ ) and protein abundance changes (Relative  $\Delta$ Abundance) were  
1258 graphed orthogonally to identify putative autophagy cargo. 140 root proteins and 116 shoot



1259 proteins with significant changes in abundance or degradation (Student's T-test,  $P < 0.05$ ) in  
1260 *atg11* are plotted in **A** and **D**. 200 root proteins and 187 shoot proteins with significant  
1261 changes in abundance/degradation (Student's T-test,  $P < 0.05$ ) in *atg5* are plotted in **B** and **E**.  
1262 The proportion of proteins shown in each quadrant that reside in a particular subcellular  
1263 location in either mutant is shown for root data in **C** and shoot data in **F**. The four colors  
1264 represent the four quadrants. Group 1 (green) represents proteins with slower degradation  
1265 rates and greater abundance, consistent with direct changes driven by deficient autophagy  
1266 substrate degradation; Group 2 (red) represents proteins with faster degradation rates and a  
1267 lower steady-state abundance, potentially driven by alternative degradation pathways  
1268 compensating for defects in autophagy; Group 3 (blue) contains proteins with faster  
1269 degradation rates and greater abundance (likely driven by enhanced protein synthesis); and  
1270 Group 4 (gray) contains proteins with slower degradation rates and lower abundance,  
1271 putative examples of feedback regulated response to impaired autophagy degradation  
1272 triggering decreasing protein synthesis.

1273  
1274 **Fig 6. Pi limitation induces changes in *atg5*, *atg11* and WT Arabidopsis plants.** (A) Arabidopsis  
1275 plants grown in hydroponics for 21 days were transferred to fresh growth media with/without  
1276 Pi for three days. (B) Free inorganic Pi concentration per fresh weight of root and shoot tissues  
1277 was measured by a colorimetric assay method. (C) Root tips of a *GFP-ATG8a* line under control  
1278 and Pi starvation conditions were treated with E64d (protease inhibitor) overnight before  
1279 confocal imaging. Confocal image of elongation region are presented as well as differential  
1280 interference contrast (DIC) images. Number of autophagic organelles (AO) per z-stack in  
1281 roots grown under control or Pi limitation conditions (Kolmogorov-Smirnov two distribution  
1282 test,  $**P < 0.01$ ). (D) Shoot tissue quantum efficiency of photosystem II (Fv/Fm) in *Wt*, *atg5* and  
1283 *atg11* lines. (E) Transcript abundance of *SPX1*, *ATG8H* and *ATG7* in *Wt*, *atg5* and *atg11*  
1284 under both control and Pi starvation conditions. Student's T-test,  $*P < 0.05$ ,  $**P < 0.01$ . Error bars show  
1285 standard deviations of four biological replicates.

1286  
1287 **Fig 7. Primary and secondary metabolite profile changes under control conditions and Pi  
1288 limitation in *atg5* and *atg11*.** Heatmaps of changes in metabolite abundance in shoots and  
1289 roots are shown. Metabolites were determined by LC/MS. Two-way ANOVA analyses were  
1290 carried out to determine the genotype and Pi starvation effects on metabolite abundance  
1291 changes. Metabolite content significantly altered due to Pi starvation, regardless of genotype,  
1292 was labelled by a hashtag (#) ( $p < 0.05$  for both T0 vs T3-P and T3-P vs T3+P). Metabolite  
1293 content significantly altered due to genotype was determined by Tukey Ad hoc analysis for  
1294 Col-0 vs either *atg5* or *atg11* and labelled by an asterisk (\*);  $*p < 0.05$  or  $**p < 0.01$ .  
1295 Metabolites with unquantifiable abundance in a given sample are shown in grey.

1296  
1297 **Fig 8. Pi limitation effects on changes of root protein abundance and degradation in *atg5*  
1298 and *atg11*.** (A,B) PCA analysis was applied to evaluate Pi limitation effects on protein  
1299 abundance and degradation changes in *Wt*, *atg11* and *atg5* using 1045 and 476 proteins,  
1300 respectively. Protein abundance data were LN transformed before being used for PCA  
1301 analysis. Principle components 1 and 2 (x and y axis) for all genotypes under both control and  
1302 Pi starvation conditions are shown for protein abundance (**A**) and protein degradation (**B**).

1303 Relative changes of protein abundance and degradation between Wt and autophagy mutant  
1304 lines were plotted to visualize Pi limitation effects on specific proteins of known location in  
1305 root cells. Relative changes in protein abundance from 194 proteins in *atg11/Wt*  
1306 comparisons (C) and from 233 proteins in *atg5/Wt* comparisons (E) are shown as  
1307 scattergrams. Relative changes in protein degradation rates from 111 proteins in *atg11/Wt*  
1308 comparisons (D) and from 115 proteins in *atg5/Wt* comparisons (F) are also shown as  
1309 scattergrams. A nonparametric Kolmogorov-Smirno test was utilized for comparison of  
1310 control and Pi starvation on distribution of relative changes in protein abundance and  
1311 degradation rate of cellular localisations to evaluate the Pi limitation effect (\*\* P<0.01,  
1312 \*P<0.05). Nine proteins show significantly faster degradation rates under Pi starvation  
1313 conditions compared with control in Wt root. Relative degradation rate changes (relative  $\Delta K_D$ )  
1314 and relative abundance changes (relative  $\Delta$ abundance) of these proteins in *Wt*, *atg5* and  
1315 *atg11* between control and Pi limiting conditions are shown as heatmaps (G).

1316

1317 **Fig 9. Pi limitation effects on changes of shoot protein abundance and degradation in *atg5***

1318 **and *atg11*.** (A,B) PCA analysis was applied to evaluate Pi limitation effects on protein  
1319 abundance and degradation changes in *Wt*, *atg11* and *atg5* using 782 and 505 proteins,  
1320 respectively. Protein abundance data were LN transformed before being used for PCA  
1321 analysis. Principle components 1 and 2 (x and y axis) for all genotypes under both control and  
1322 Pi starvation conditions are shown for protein abundance (A) and protein degradation (B).  
1323 Relative changes of protein abundance and degradation between Wt and autophagy mutant  
1324 lines were plotted to visualize Pi limitation effects on specific proteins of known location in  
1325 shoot cells. Relative changes in protein abundance from 238 proteins in *atg11/Wt*  
1326 comparisons (C) and from 234 proteins in *atg5/Wt* comparisons (E) are shown as  
1327 scattergrams. Relative changes in protein degradation rates from 50 proteins in *atg11/Wt*  
1328 comparisons (D) and from 52 proteins in *atg5/Wt* comparisons (F) are also shown as  
1329 scattergrams. A nonparametric Kolmogorov-Smirno test was utilized for comparison of  
1330 control and Pi starvation on distribution of relative changes in protein abundance and  
1331 degradation rate of cellular localisations to evaluate the Pi limitation effect (\*\* P<0.01,  
1332 \*P<0.05). Six proteins show significantly faster degradation rates under Pi limiting conditions  
1333 compared with control in Wt shoot. Their relative degradation rate changes (relative  $\Delta K_D$ )  
1334 and relative abundance changes (relative  $\Delta$ abundance) in *Wt*, *atg5* and *atg11* between  
1335 control and Pi limiting conditions are shown as heatmaps (G).

1336

1337

---

1338 **Tables**

1339 **Table 1. Cellular compartments with significant slower protein degradation rate in *atg5/11***  
1340 **mutants compared with wild-type Arabidopsis.**

1341 Percentage of proteins resident in major cellular compartments that showed significant  
1342 slower degradation rate in *atg11* and *atg5* than in Wt. In root, the majority of proteins with  
1343 slower degradation rate are located in the cytosol, mitochondrion or ER. In shoot, the  
1344 majority are in the cytosol, chloroplast and mitochondrion. Cellular localization of proteins  
1345 beyond the top three are marked as others. Numbers in brackets are the number of proteins  
1346 with slower protein degradation rate divided by the total number of proteins from that  
1347 location that were analysed.

1348

---

|              | <i>atg11/Wt</i> | <i>atg5/Wt</i> | Subcellular location |
|--------------|-----------------|----------------|----------------------|
| <b>Root</b>  | 68% (45/66)     | 82% (42/51)    | Cytosol              |
|              | 17% (11/66)     | 2% (1/51)      | mitochondrion        |
|              | 5% (3/66)       | 4% (2/51)      | ER                   |
|              | 11% (7/66)      | 12% (6/51)     | Others               |
| <b>Shoot</b> | 33% (8/24)      | 64% (9/14)     | Cytosol              |
|              | 33% (8/24)      | 7% (1/14)      | chloroplast          |
|              | 21% (5/24)      | 0% (0/14)      | mitochondrion        |
|              | 13% (3/24)      | 29% (3/14)     | Others               |

---

1349

1350

---

1351 **Supplemental Tables**

1352 **Table S1** Identification of putative ATG5 and ATG11 targets in Arabidopsis roots as proteins  
1353 with higher abundance and slower degradation rates in *atg5* or *atg11* compared with  
1354 wild-type.

1355 **Table S2** Identification of putative ATG5 and ATG11 targets in Arabidopsis shoots as proteins  
1356 with higher abundance and slower degradation rates in *atg5* or *atg11* compared with  
1357 wild-type.

1358

1359 **Supplemental Figures**

1360 **Fig S1** Arabidopsis *atg5* and *atg11* phenotypes compared to Wt plants.

1361 **Fig S2** Changes in protein abundance in roots and shoots of Arabidopsis autophagy mutants.

1362 **Fig S3** Significant changes in abundance of ribosome and proteasome subunits in  
1363 Arabidopsis autophagy mutants.

1364 **Fig S4** Significant changes in relative  $\Delta$ abundance of 241 root proteins in Arabidopsis  
1365 autophagy mutants.

1366 **Fig S5** Significant changes in relative  $\Delta$ abundance of 265 shoot proteins in Arabidopsis  
1367 autophagy mutants.

1368 **Fig S6** Changes in protein degradation rate ( $K_D$ ) in roots and shoots of Arabidopsis autophagy  
1369 mutants compared to Wt.

1370 **Fig S7** Effects of Pi limitation on protein abundance in roots and shoots of Wt and autophagy  
1371 mutants.

1372 **Fig S8** Effects of Pi limitation on protein degradation rates in roots and shoots of Wt and  
1373 autophagy mutants.

1374 **Fig S9** Workflow of analysis to determine protein abundance, protein degradation rates and  
1375 metabolite abundances in samples from Arabidopsis plant tissues.

1376

1377 **Supplemental Data**

1378 **DataS1** Changes in protein abundance in roots and shoots of hydroponically grown  
1379 Arabidopsis autophagy mutants compared to wild type.

1380 **DataS2** Changes in protein abundance of proteins belonging to different subcellular  
1381 locations in autophagy mutants compared to wild type.

1382 **DataS3** Changes in protein degradation rate in autophagy mutants.

1383 **DataS4** Changes in protein abundance and degradation rate in autophagy mutants.

1384 **DataS5** Proteins with significant differences in protein abundance & degradation rate.

1385 **DataS6** Root proteins with significant changes in their abundance & degradation rate.

1386 **DataS7** Changes in protein abundance in wild type and autophagy mutants under control  
1387 and Pi limiting conditions.

1388 **DataS8** Changes in protein degradation rate in wild type and autophagy mutants under  
1389 control and Pi limiting conditions.

1390 **DataS9** Protein degradation rates and protein abundance data for PCA analysis.

1391 **DataS10** Proteins with faster turnover rates under Pi limitation conditions in wild type

1392 **DataS11** Metabolites measurement using mass spectrometry.

1393 **DataS12** Precursor masses of metabolites used in LC-MS analysis.

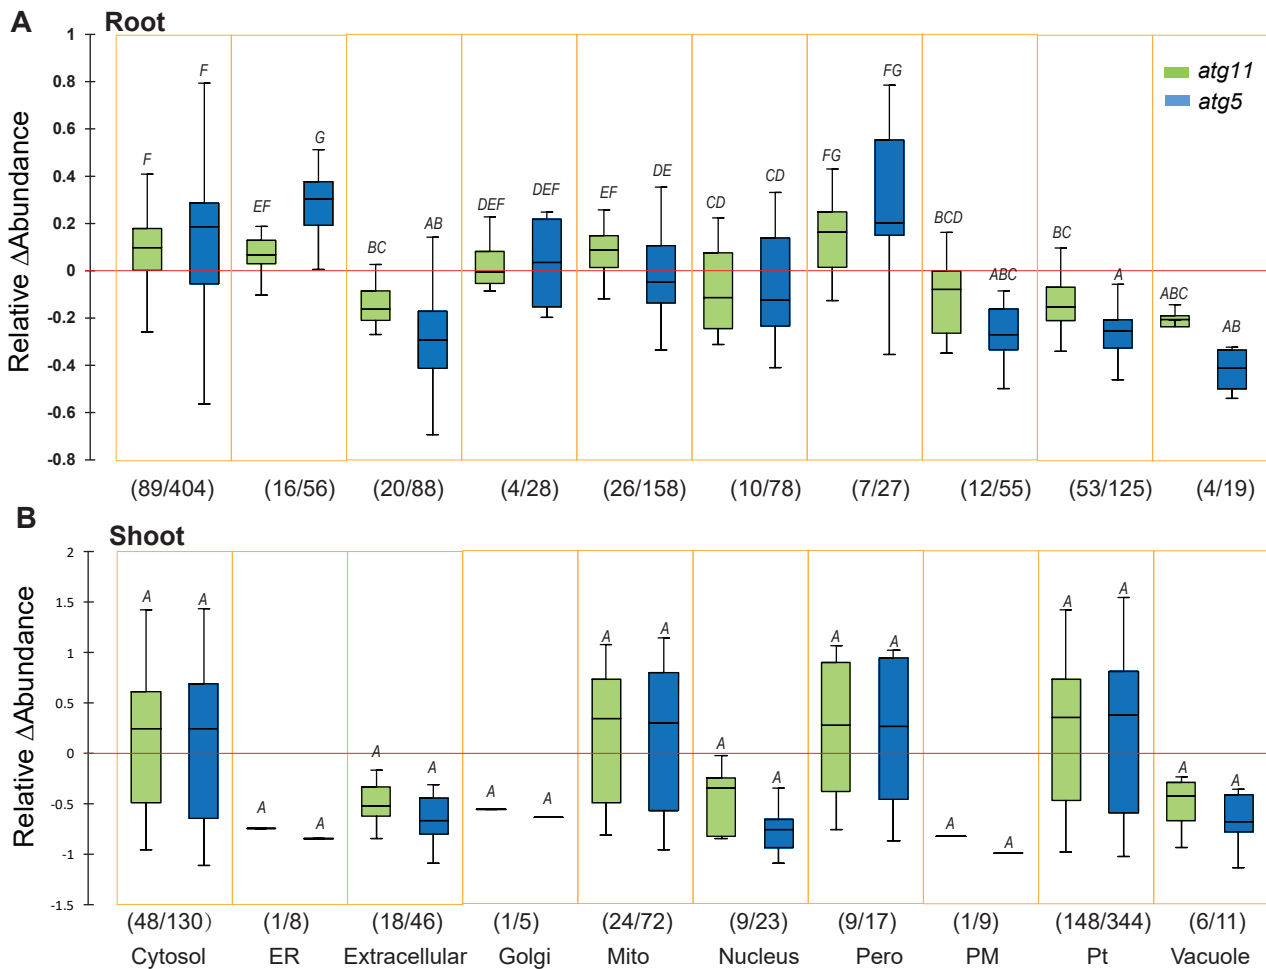

**Fig 1. Changes in abundance of proteins in *atg5* and *atg11* that are resident in different subcellular locations.** Box plots of relative changes in abundance of 241 root (A) and 265 shoot (B) proteins from *atg5* and *atg11* which significantly changed in abundance in comparison with WT ( $p < 0.05$ ). These were from the larger set of 1114 root and 698 shoot proteins that were quantified in all genotypes.  $\Delta$ Abundance changes of specific root and shoot proteins are shown in Fig S2 and Fig S3. Numbers of significantly changing (x) and total quantified (y) proteins for each subcellular location (x/y) are shown. A comparison of k-samples distributions (Kruskal-Wallis) was performed in XLSTAT to evaluate the level of changes in subcellular locations. Changes in abundance of proteins in root can be divided into A-G groups with increasing values. Changes in abundance of proteins in shoot can be only divided into A group. An explanation of values defining each group would be important.

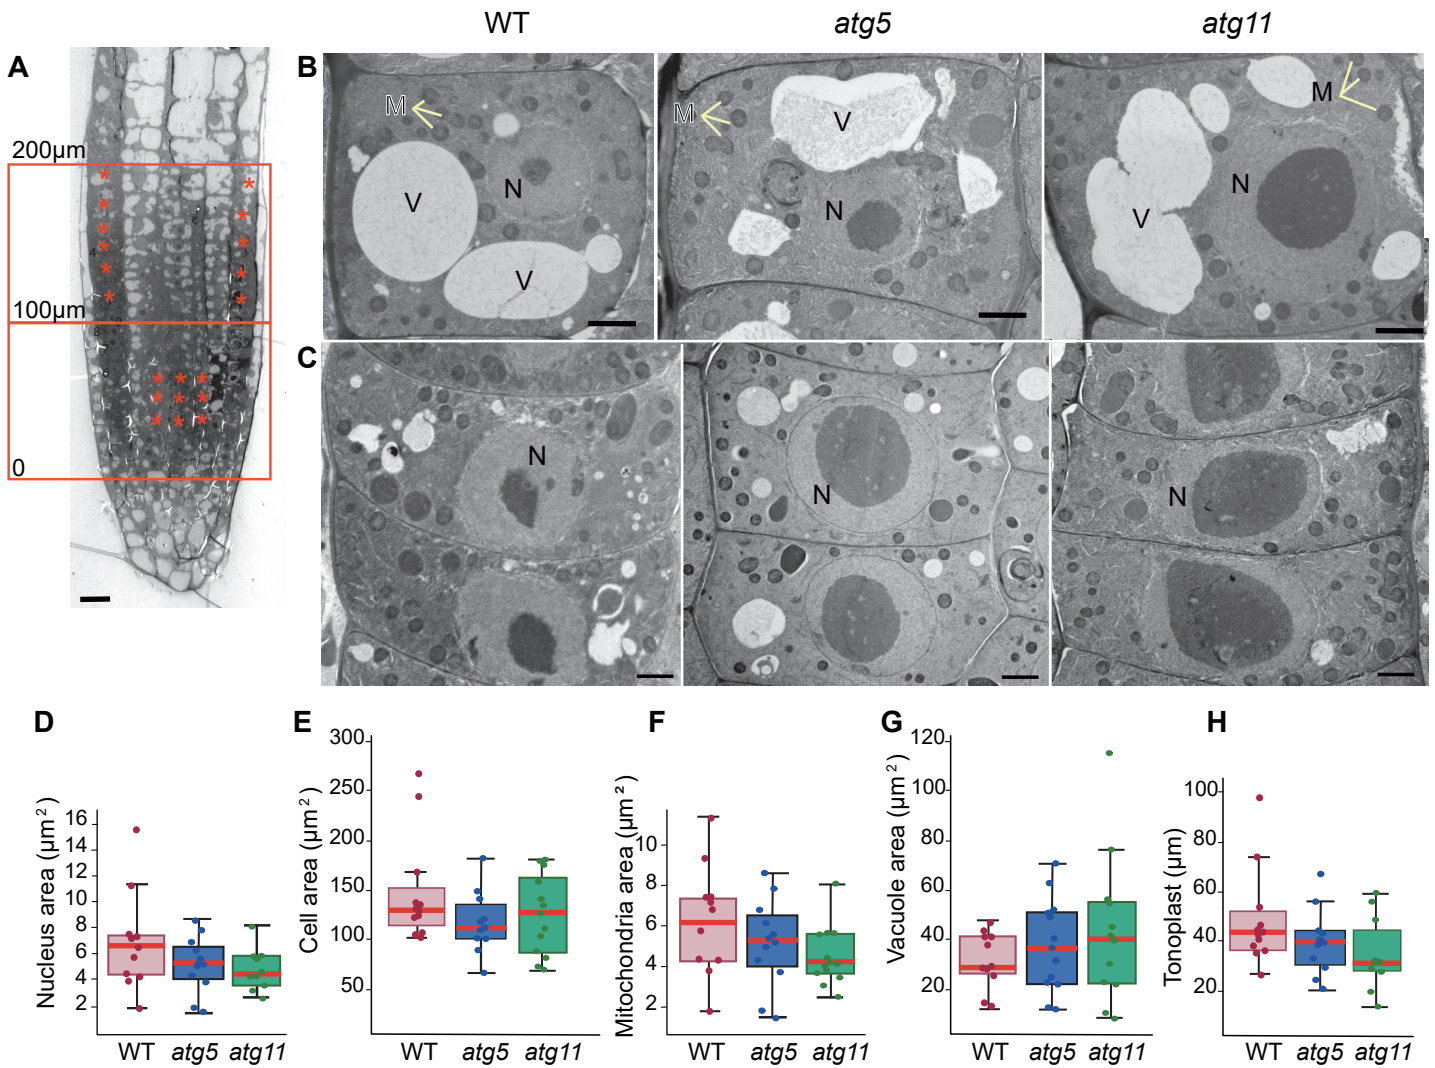

**Fig 2. Transmission electron microscopy analysis of WT, *atg5*, and *atg11* root cells.**

(A) Longitudinal section of a WT root showing the areas selected for analysis: meristem region (up to 100  $\mu\text{m}$  from quiescent center; QC) and the adjacent area up to 200  $\mu\text{m}$  from the QC where cells are actively developing vacuoles. Asterisks indicate examples of cells that were analyzed. (B) Cell with developing vacuoles (C) Meristematic cells; D-E Quantification of vacuolated cell area per section (D), nuclear area in meristematic cells (E), mitochondrial and vacuolar area per section of vacuolated cells (F,G) and length of tonoplast per section of vacuolated cells (H). Between 10 and 13 cells from two roots of each genotype were used for this analysis. M, mitochondria; N, nucleus; V, vacuole. Scales bars= 10  $\mu\text{m}$  in (A); 2  $\mu\text{m}$  in (B,C).

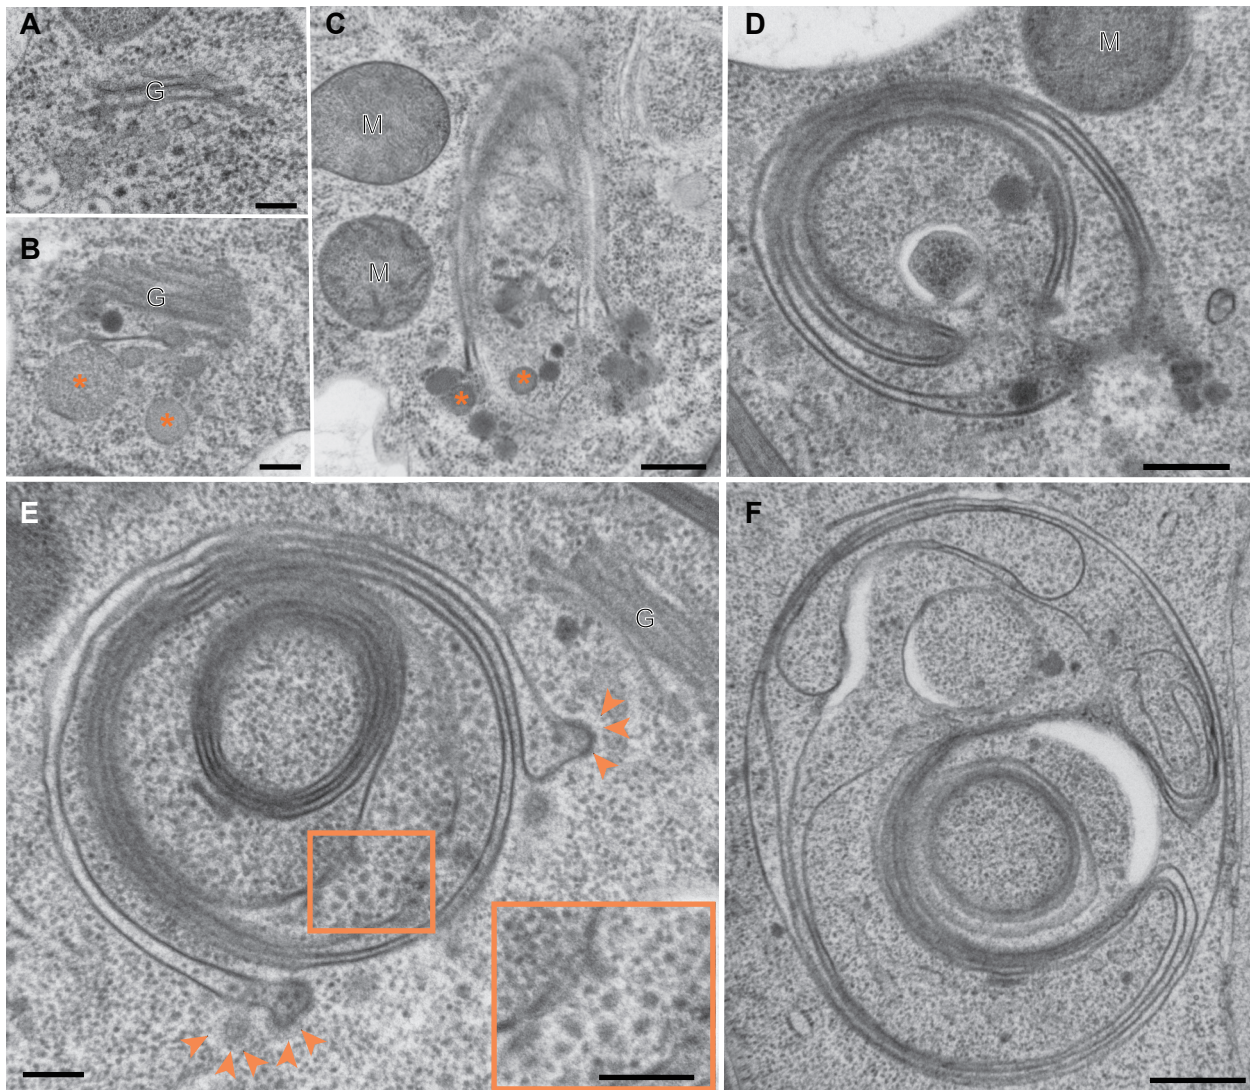

**Fig 3. Abnormal organelles in *atg5* root cells.** (A) Golgi stack in WT cells. (B) Golgi stack and associated TGN with dilated vesicle profiles (asterisks) in *atg5*. (C)-(F) Large membranous structures with concentric membranes in *atg5*. Some of these structures displayed budding profiles at their edges (asterisks in C). Budding sites with assembled coats (E, asterisks) are commonly seen on these structures. Enclosed by these membranes, there are electron dense aggregates 2-3 times larger than a cytosolic ribosomes (E and inset). G, Golgi stack; M, mitochondrion. Scale bars= 200 nm (A,B, E); 400 nm (C,D); 500 nm (F).

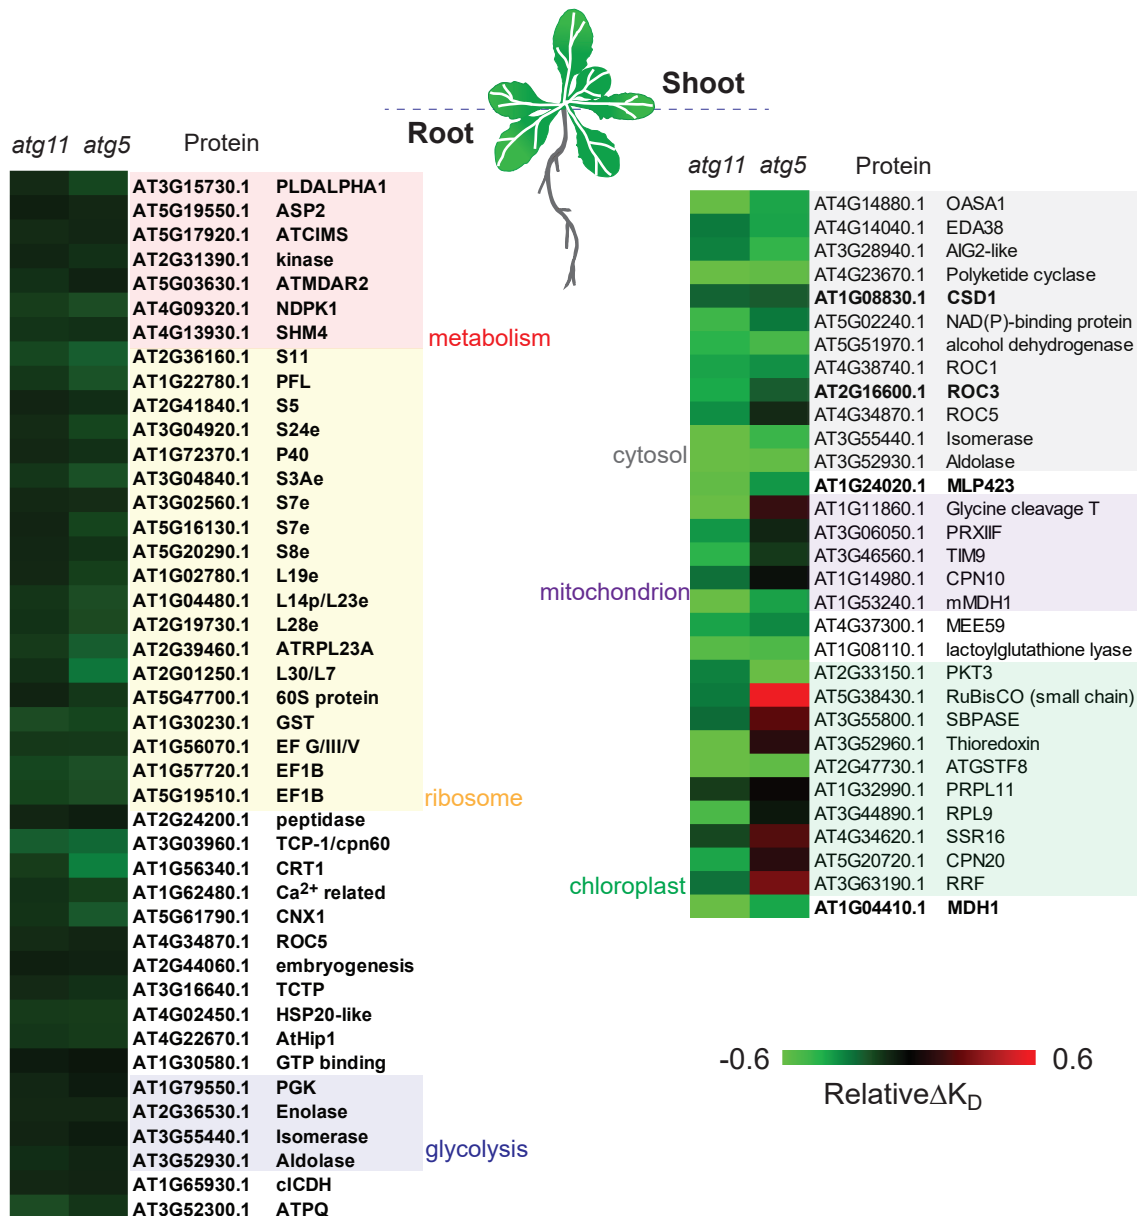

**Fig 4. Specific proteins that degrade more slowly in *atg5* and *atg11* roots and shoots compared with wild-type Arabidopsis. (A)** A heatmap of 43 root proteins with significant slower degradation rate (relative  $\Delta K_D$ ) in both *atg5* and *atg11*. **(B)** A heatmap of 31 shoot proteins with significant slower  $\Delta K_D$  in *atg5* or *atg11*. Proteins with significance differences in both *atg5* and *atg11* and shown in bold font. Proteins are group according to the top three functional categories in root and top 3 organelles in shoot tissues. Specific protein degradation rates in WT, *atg5* and *atg11* can be found in Data S3.



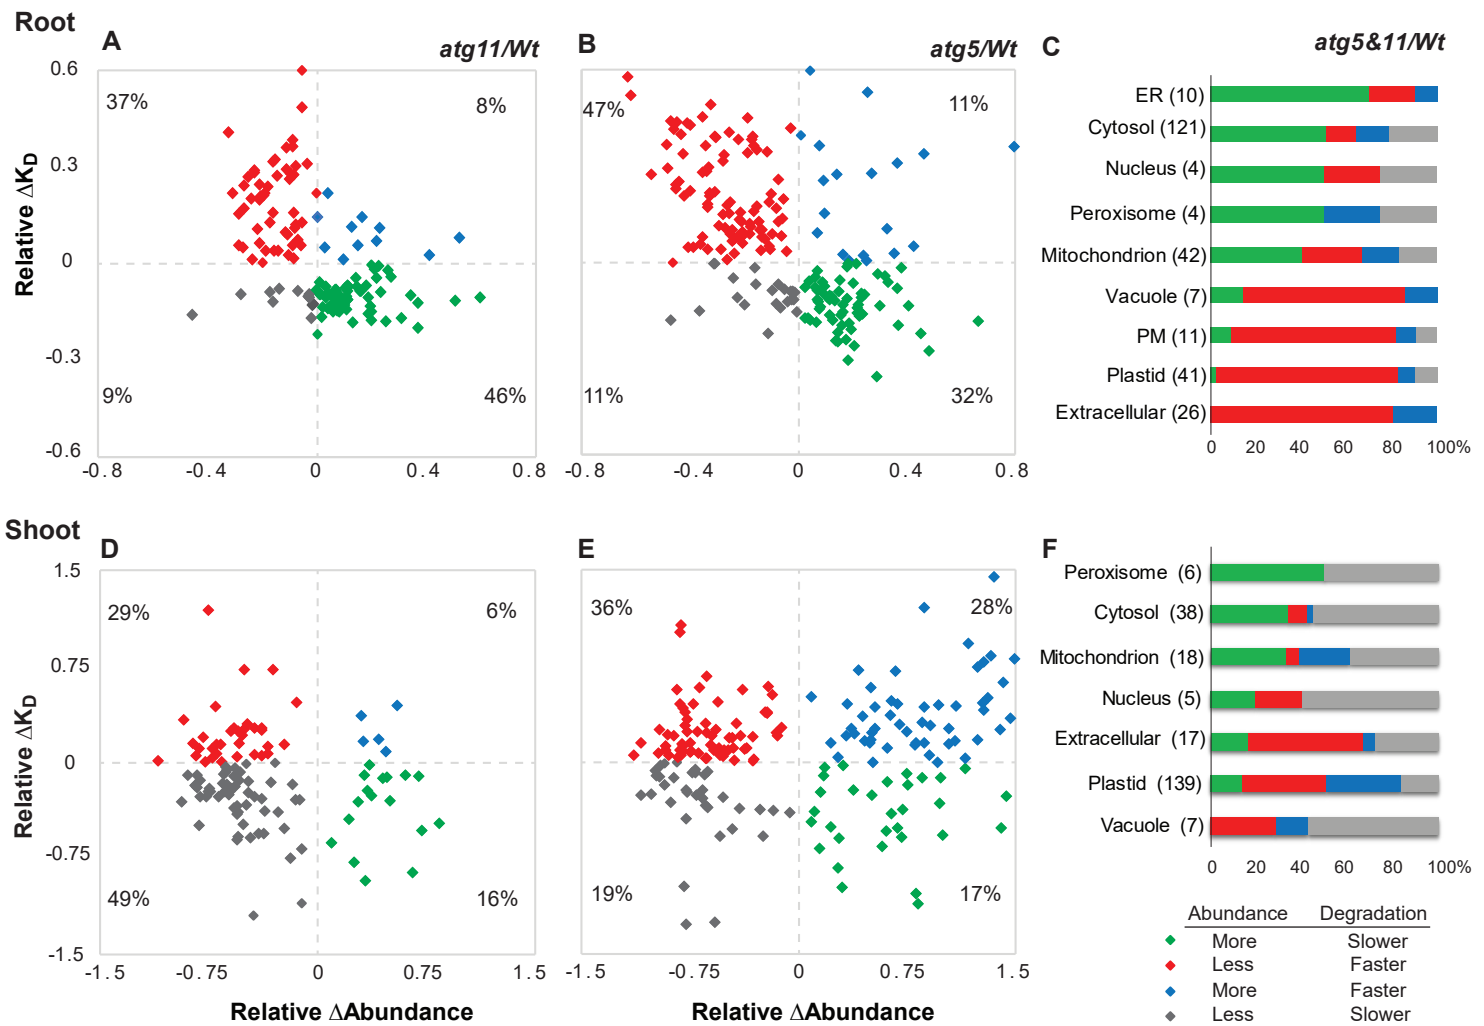

**Fig 5. Combination of changes in abundance and degradation rate for proteins in *atg5* and *atg11* from different cellular compartments.** Matching sets of protein degradation rate changes (Relative  $\Delta KD$ ) and protein abundance changes (Relative  $\Delta Abundance$ ) were graphed orthogonally to identify putative autophagy cargo. 140 root proteins and 116 shoot proteins with significant changes in abundance or degradation (Student's T-test,  $P < 0.05$ ) in *atg11* are plotted in **A** and **D**. 200 root proteins and 187 shoot proteins with significant changes in abundance/degradation (Student's T-test,  $P < 0.05$ ) in *atg5* are plotted in **B** and **E**. The proportion of proteins shown in each quadrant that reside in a particular subcellular location in either mutant is shown for root data in **C** and shoot data in **F**. The four colors represent the four quadrants. Group 1 (green) represents proteins with slower degradation rates and greater abundance, consistent with direct changes driven by deficient autophagy substrate degradation; Group 2 (red) represents proteins with faster degradation rate and a lower steady-state abundance, potentially driven by alternative degradation pathways compensating for defects in autophagy; Group 3 (blue) contains proteins with faster degradation rates and greater abundance (likely driven by enhanced protein synthesis); and Group 4 (gray) contains proteins with slower degradation rates and lower abundance, putative examples of feedback regulated response to impaired autophagy degradation triggering decreasing protein synthesis.

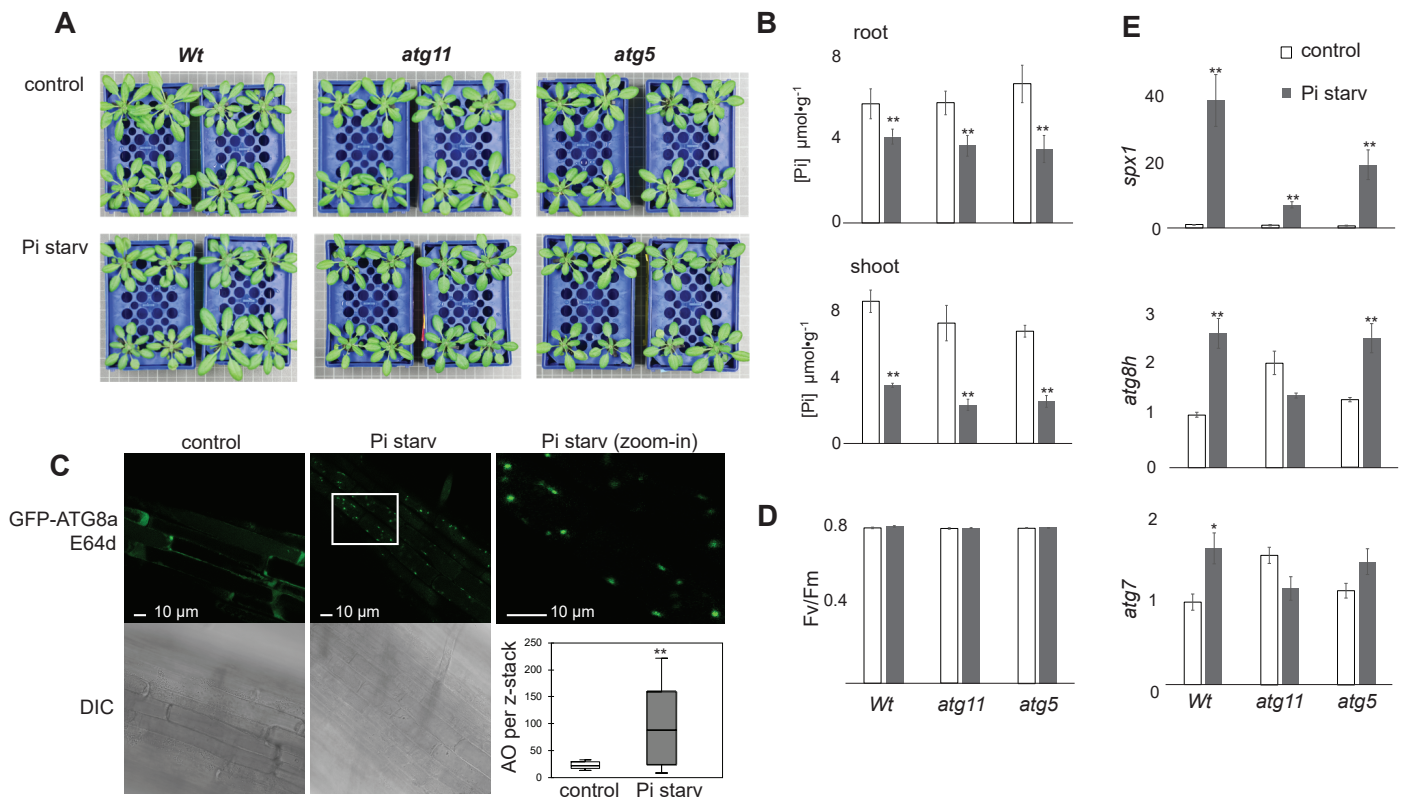

**Fig 6. Pi limitation induces changes in *atg5*, *atg11* and WT Arabidopsis plants. (A)** Arabidopsis plants grown in hydroponics for 21 days were transferred to fresh growth media with/without Pi for three days. **(B)** Free inorganic Pi concentration per fresh weight of root and shoot tissues was measured by a colorimetric assay method. **(C)** Root tips of a *GFP-ATG8a* line under control and Pi starvation conditions were treated with E64d (protease inhibitor) overnight before confocal imaging. Confocal images of elongation region are presented as well as differential interference contrast (DIC) images. Number of autophagic organelles (AO) per z-stack in roots grown under control or Pi limitation conditions (Kolmogorov-Smirnov two distribution test,  $**P < 0.01$ ). **(D)** Shoot tissue quantum efficiency of photosystem II (Fv/Fm) in *Wt*, *atg5* and *atg11* lines. **(E)** Transcript abundance of *SPX1*, *ATG8H* and *ATG7* in *Wt*, *atg5* and *atg11* under both control and Pi starvation conditions. Student's T-test,  $*P < 0.05$ ,  $**P < 0.01$ . Error bars show standard deviations of four biological replicates.

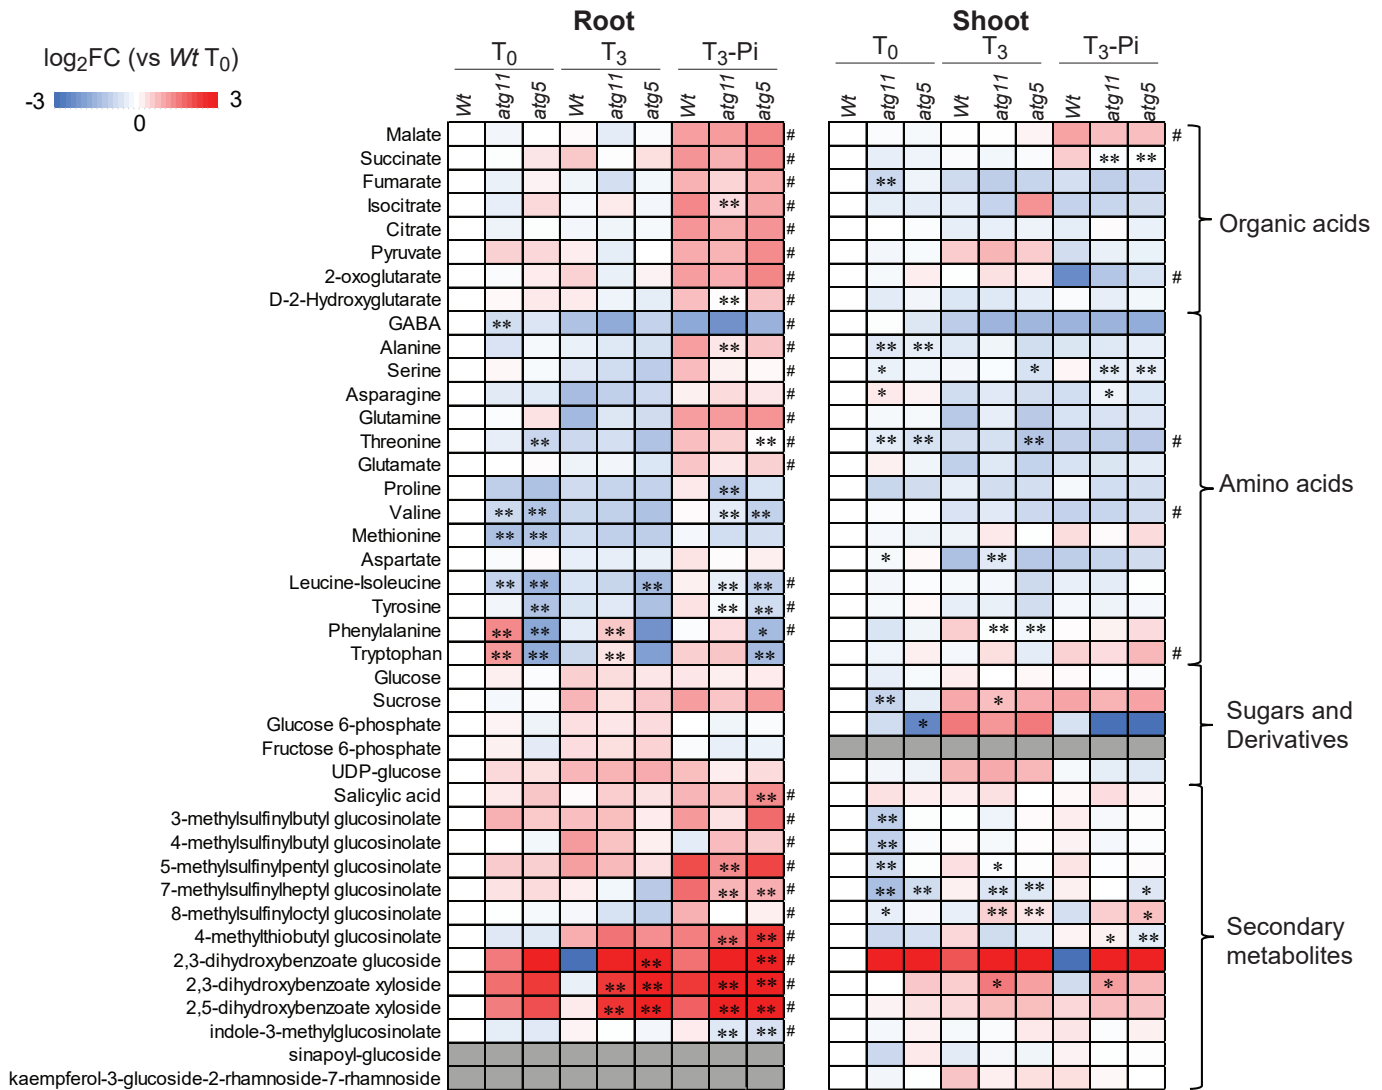

**Fig 7. Primary and secondary metabolite profile changes under control conditions and Pi limitation in *atg5* and *atg11*.** Heatmaps of changes in metabolite abundance in shoots and roots are shown. Metabolites were determined by LC/MS. Twoway ANOVA analyses were carried out to determine the genotype and Pi starvation effects on metabolite abundance changes. Metabolite content significantly altered due to Pi starvation, regardless of genotype, was labelled by a hashtag (#) ( $p < 0.05$  for both T<sub>0</sub> vs T<sub>3</sub>-P and T<sub>3</sub>-P vs T<sub>3</sub>+P). Metabolite content significantly altered due to genotype was determined by Tukey Ad hoc analysis for Col0 vs either *atg5* or *atg11* and labelled by an asterisk (\*); \* $p < 0.05$  or \*\*  $p < 0.01$ . Metabolites with unquantifiable abundance in a given sample are shown in grey.

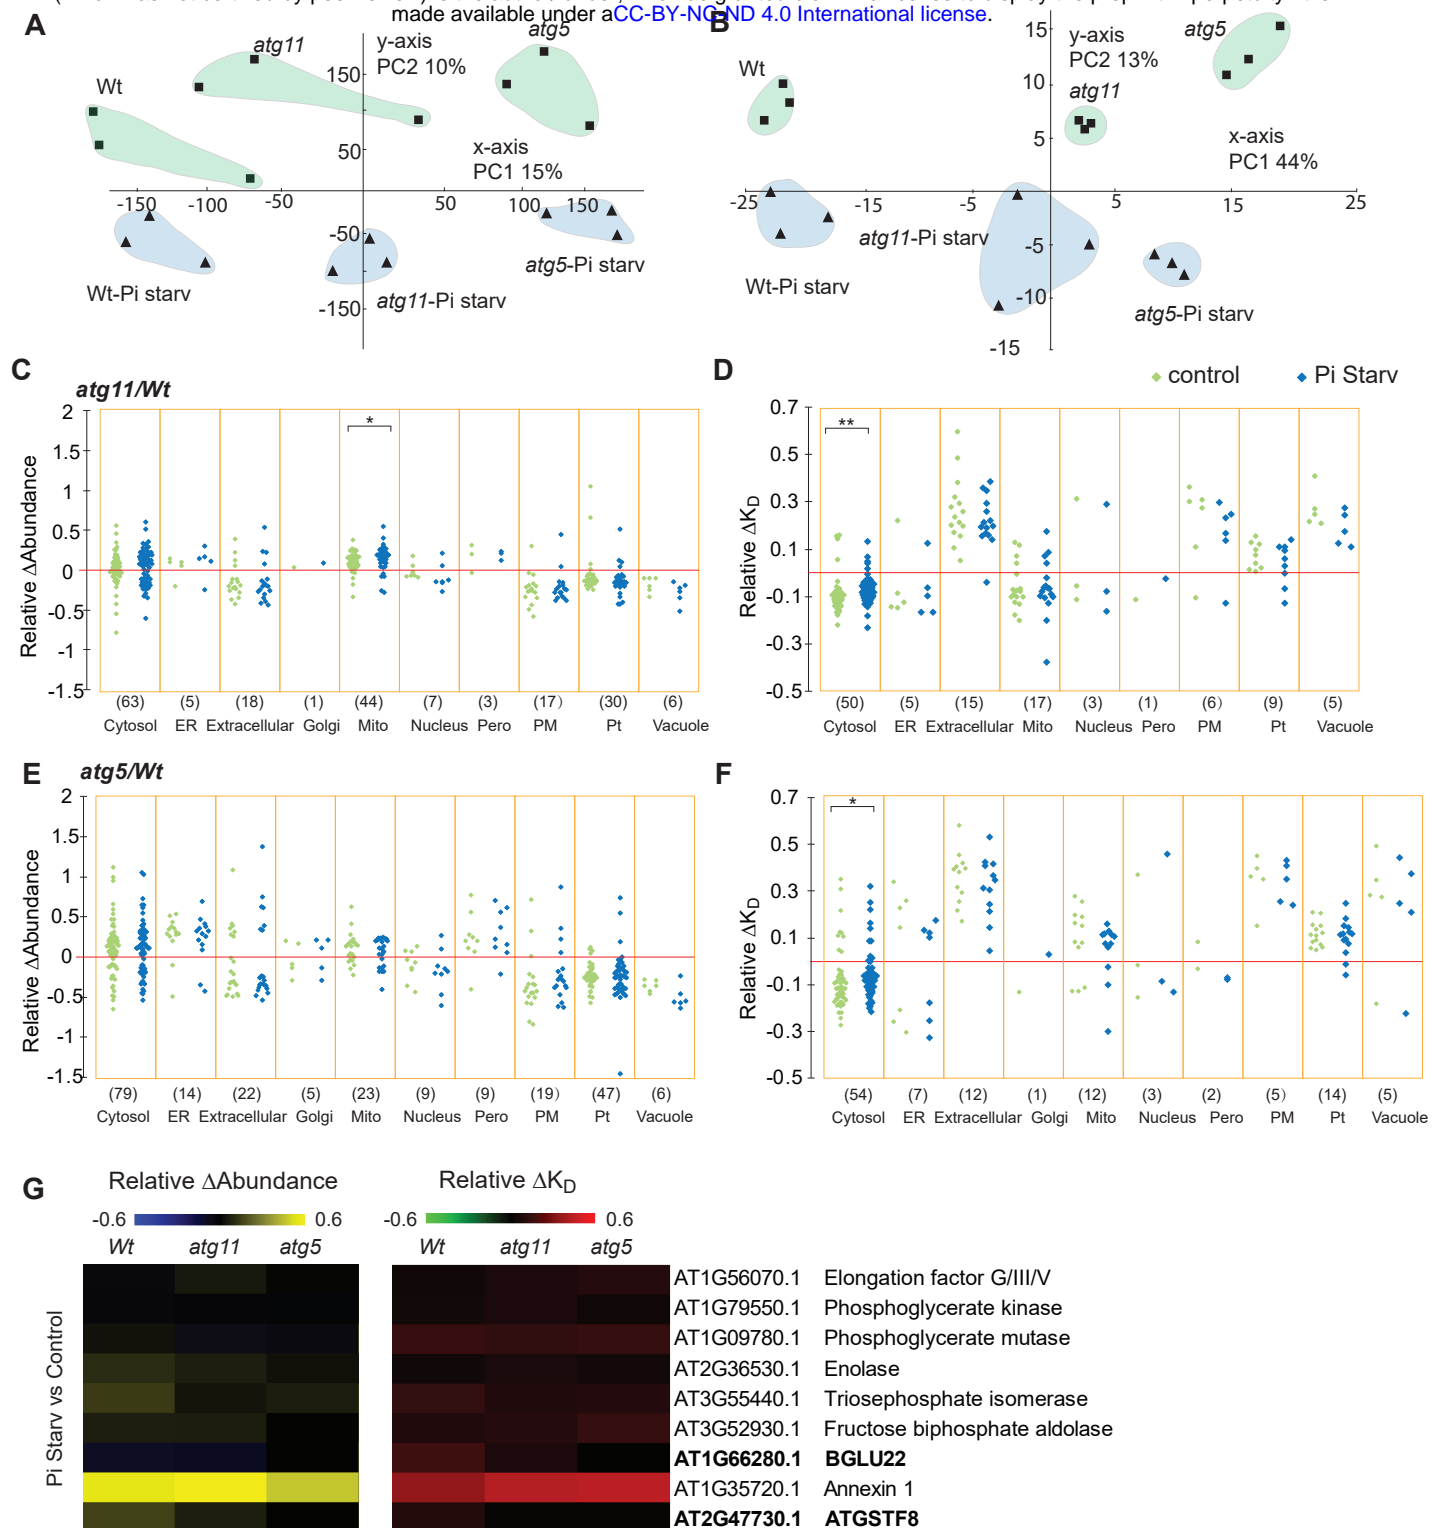

**Fig 8. Pi limitation effects on changes of root protein abundance and degradation in *atg5* and *atg11*.** (A,B) PCA analysis was applied to evaluate Pi limitation effects on protein abundance and degradation changes in *Wt*, *atg11* and *atg5* using 1045 and 476 proteins, respectively. Protein abundance data were LN transformed before being used for PCA analysis. Principle components 1 and 2 (x and y axis) for all genotypes under both control and Pi starvation conditions are shown for protein abundance (A) and protein degradation (B). Relative changes of protein abundance and degradation between *Wt* and autophagy mutant lines were plotted to visualize Pi limitation effects on specific proteins of known location in root cells. Relative changes in protein abundance from 194 proteins in *atg11/Wt* comparisons (C) and from 233 proteins in *atg5/Wt* comparisons (E) are shown as scattergrams. Relative changes in protein degradation rates from 111 proteins in *atg11/Wt* comparisons (D) and from 115 proteins in *atg5/Wt* comparisons (F) are also shown as scattergrams. A nonparametric Kolmogorov-Smirno test was utilized for comparison of control and Pi starvation on distribution of relative changes in protein abundance and degradation rate of cellular localisations to evaluate the Pi limitation effect (\*\* P<0.01, \*P<0.05). Nine proteins show significantly faster degradation rates under Pi starvation conditions compared with control in *Wt* root. Relative degradation rate changes (relative  $\Delta$ K<sub>D</sub>) and relative abundance changes (relative  $\Delta$ abundance) of these proteins in *Wt*, *atg5* and *atg11* between control and Pi limiting conditions are shown as heatmaps (G).

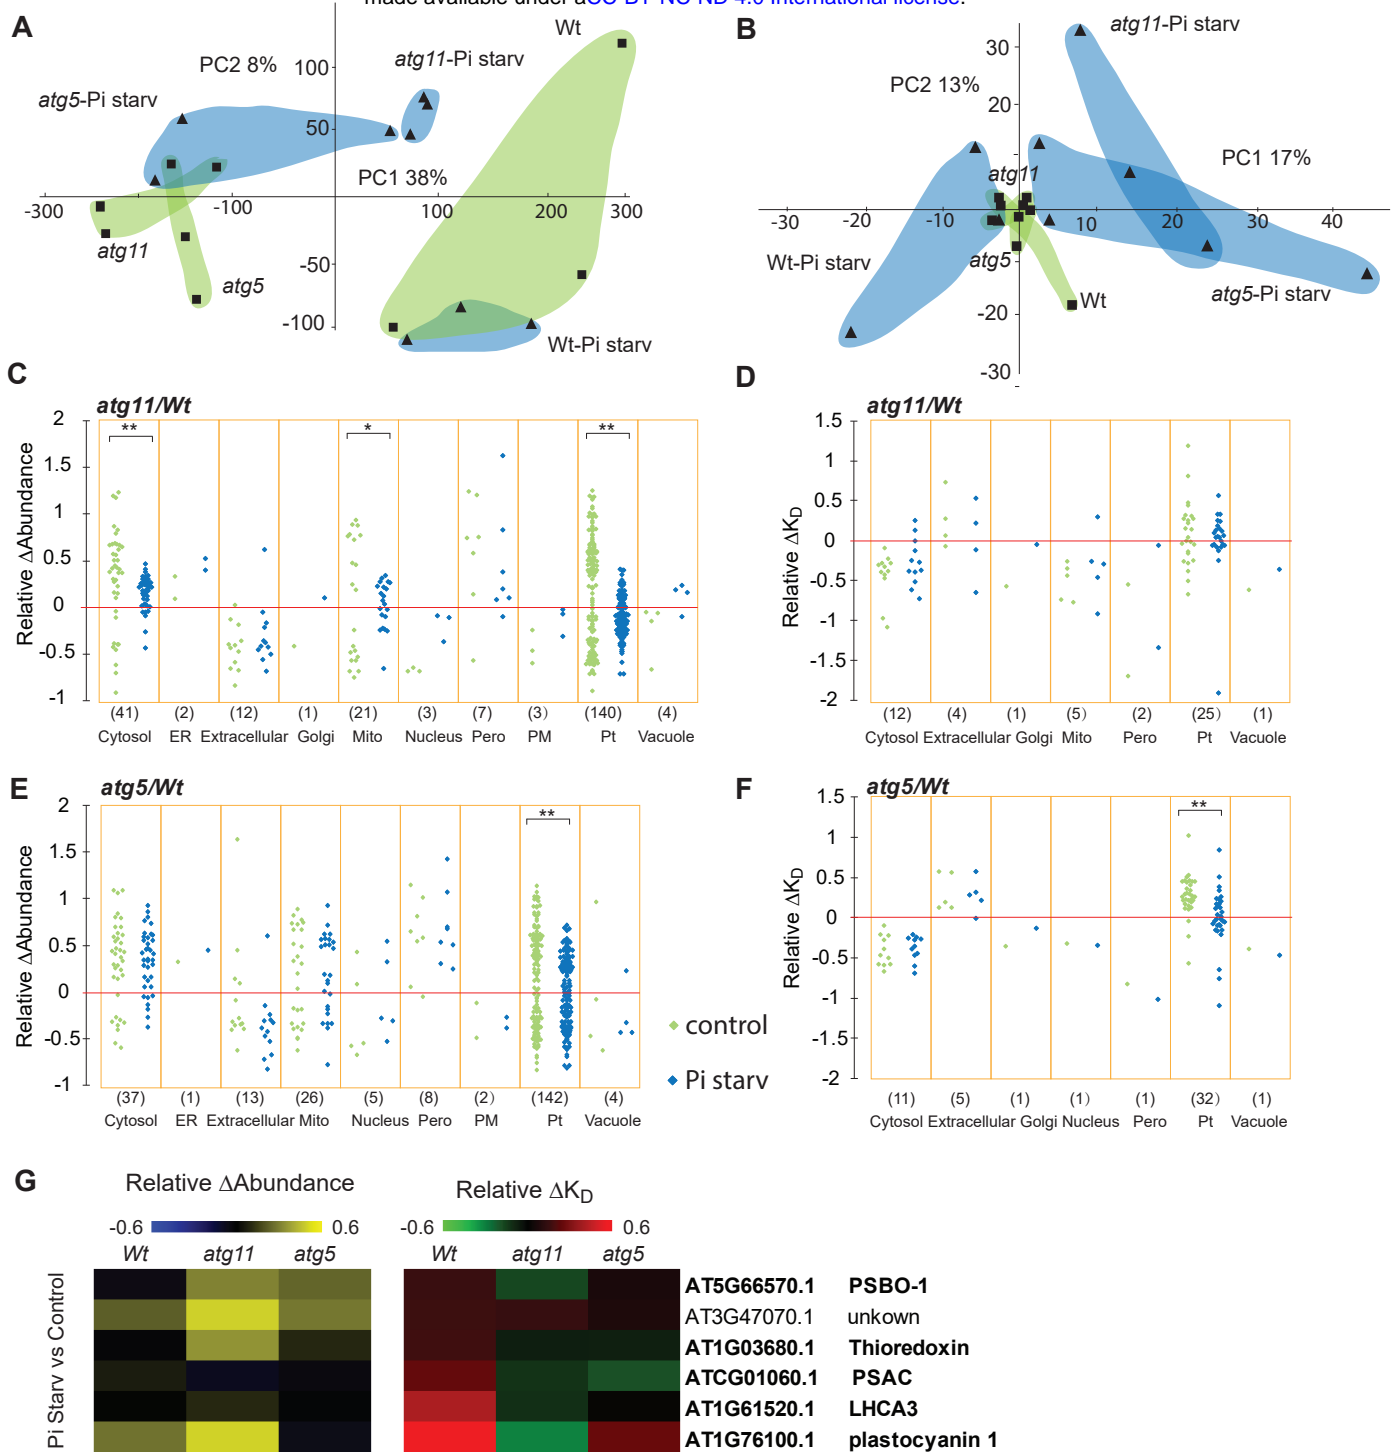

**Fig 9. Pi limitation effects on changes of shoot protein abundance and degradation in *atg5* and *atg11*.** (A,B) PCA analysis was applied to evaluate Pi limitation effects on protein abundance and degradation changes in *Wt*, *atg11* and *atg5* using 782 and 505 proteins, respectively. Protein abundance data were LN transformed before being used for PCA analysis. Principle components 1 and 2 (x and y axis) for all genotypes under both control and Pi starvation conditions are shown for protein abundance (A) and protein degradation (B). Relative changes of protein abundance and degradation between *Wt* and autophagy mutant lines were plotted to visualize Pi limitation effects on specific proteins of known location in shoot cells. Relative changes in protein abundance from 238 proteins in *atg11*/*Wt* comparisons (C) and from 234 proteins in *atg5*/*Wt* comparisons (E) are shown as scattergrams. Relative changes in protein degradation rates from 50 proteins in *atg11*/*Wt* comparisons (D) and from 52 proteins in *atg5*/*Wt* comparisons (F) are also shown as scattergrams. A nonparametric Kolmogorov-Smirno test was utilized for comparison of control and Pi starvation on distribution of relative changes in protein abundance and degradation rate of cellular localisations to evaluate the Pi limitation effect (\*\*  $P < 0.01$ , \*  $P < 0.05$ ). Six proteins show significantly faster degradation rates under Pi limiting conditions compared with control in *Wt* shoot. Their relative degradation rate changes (relative  $\Delta K_D$ ) and relative abundance changes (relative  $\Delta$ abundance) in *Wt*, *atg5* and *atg11* between control and Pi limiting conditions are shown as heatmaps (G).

## Parsed Citations

- Ahn, H.K., Yoon, J.T., Choi, I., Kim, S., Lee, H.S., and Pai, H.S. (2019). Functional characterization of chaperonin containing T-complex polypeptide-1 and its conserved and novel substrates in *Arabidopsis*. *Journal of experimental botany* 70, 2741-2757.  
Google Scholar: [Author Only](#) [Title Only](#) [Author and Title](#)
- Ames, B.N. (1966). [10] Assay of inorganic phosphate, total phosphate and phosphatases. In *Methods in Enzymology* (Academic Press), pp. 115-118.  
Google Scholar: [Author Only](#) [Title Only](#) [Author and Title](#)
- An, H., and Harper, J.W. (2018). Systematic analysis of ribophagy in human cells reveals bystander flux during selective autophagy. *Nat Cell Biol* 20, 135-143.  
Google Scholar: [Author Only](#) [Title Only](#) [Author and Title](#)
- Araújo, W.L., Tohge, T., Ishizaki, K., Leaver, C.J., and Fernie, A.R. (2011). Protein degradation – an alternative respiratory substrate for stressed plants. *Trends Plant Sci*.  
Google Scholar: [Author Only](#) [Title Only](#) [Author and Title](#)
- Avin-Wittenberg, T., Bajdzienko, K., Wittenberg, G., Alosekh, S., Tohge, T., Bock, R., Giavalisco, P., and Fernie, A.R. (2015). Global analysis of the role of autophagy in cellular metabolism and energy homeostasis in *Arabidopsis* seedlings under carbon starvation. *The Plant cell* 27, 306-322.  
Google Scholar: [Author Only](#) [Title Only](#) [Author and Title](#)
- Barros, J.A.S., Cavalcanti, J.H.F., Medeiros, D.B., Nunes-Nesi, A., Avin-Wittenberg, T., Fernie, A.R., and Araujo, W.L. (2017). Autophagy Deficiency Compromises Alternative Pathways of Respiration following Energy Deprivation in *Arabidopsis thaliana*. *Plant physiology* 175, 62-76.  
Google Scholar: [Author Only](#) [Title Only](#) [Author and Title](#)
- Barros, J.A.S., Magen, S., Lapidot-Cohen, T., Rosental, L., Brotman, Y., Araujo, W.L., and Avin-Wittenberg, T. (2021). Autophagy is required for lipid homeostasis during dark-induced senescence. *Plant physiology*.  
Google Scholar: [Author Only](#) [Title Only](#) [Author and Title](#)
- Bartsch, M., Bednarek, P., Vivancos, P.D., Schneider, B., von Roepenack-Lahaye, E., Foyer, C.H., Kombrink, E., Scheel, D., and Parker, J.E. (2010). Accumulation of Isochorismate-derived 2,3-Dihydroxybenzoic 3-O-beta-D-Xyloside in *Arabidopsis* Resistance to Pathogens and Ageing of Leaves. *Journal of Biological Chemistry* 285, 25654-25665.  
Google Scholar: [Author Only](#) [Title Only](#) [Author and Title](#)
- Berson, T., von Wangenheim, D., Takac, T., Samajova, O., Rosero, A., Ovecká, M., Komis, G., Stelzer, E.H., and Samaj, J. (2014). Trans-Golgi network localized small GTPase RabA1d is involved in cell plate formation and oscillatory root hair growth. *BMC Plant Biol* 14, 252.  
Google Scholar: [Author Only](#) [Title Only](#) [Author and Title](#)
- Bialecki, J.B., Ruzicka, J., Weisbecker, C.S., Haribal, M., and Attygalle, A.B. (2010). Collision-induced dissociation mass spectra of glucosinolate anions. *J Mass Spectrom* 45, 272-283.  
Google Scholar: [Author Only](#) [Title Only](#) [Author and Title](#)
- Boyes, D.C., Zayed, A.M., Ascenzi, R., McCaskill, A.J., Hoffman, N.E., Davis, K.R., and Grolach, J. (2001). Growth stage-based phenotypic analysis of *Arabidopsis*: a model for high throughput functional genomics in plants. *The Plant cell* 13, 1499-1510.  
Google Scholar: [Author Only](#) [Title Only](#) [Author and Title](#)
- Chotewutmontri, P., and Barkan, A. (2016). Dynamics of Chloroplast Translation during Chloroplast Differentiation in Maize. *PLoS Genet* 12, e1006106.  
Google Scholar: [Author Only](#) [Title Only](#) [Author and Title](#)
- Czechowski, T., Stitt, M., Altmann, T., Udvardi, M.K., and Scheible, W.R. (2005). Genome-wide identification and testing of superior reference genes for transcript normalization in *Arabidopsis*. *Plant physiology* 139, 5-17.  
Google Scholar: [Author Only](#) [Title Only](#) [Author and Title](#)
- Dengjel, J., Høyer-Hansen, M., Nielsen, M.O., Eisenberg, T., Harder, L.M., Schandorff, S., Farkas, T., Kirkegaard, T., Becker, A.C., Schroeder, S., Vanselow, K., Lundberg, E., Nielsen, M.M., Kristensen, A.R., Akimov, V., Bunkenborg, J., Madeo, F., Jäättelä, M., and Andersen, J.S. (2012). Identification of Autophagosome-associated Proteins and Regulators by Quantitative Proteomic Analysis and Genetic Screens. *Mol Cell Proteomics* 11.  
Google Scholar: [Author Only](#) [Title Only](#) [Author and Title](#)
- Deutsch, E.W., Mendoza, L., Shteynberg, D., Farrah, T., Lam, H., Tasman, N., Sun, Z., Nilsson, E., Pratt, B., Prazan, B., Eng, J.K., Martin, D.B., Nesvizhskii, A.I., and Aebersold, R. (2010). A guided tour of the Trans-Proteomic Pipeline. *Proteomics* 10, 1150-1159.  
Google Scholar: [Author Only](#) [Title Only](#) [Author and Title](#)
- Farmer, L.M., Rinaldi, M.A., Young, P.G., Danan, C.H., Burkhart, S.E., and Bartel, B. (2013). Disrupting autophagy restores peroxisome function to an *Arabidopsis* lon2 mutant and reveals a role for the LON2 protease in peroxisomal matrix protein degradation. *The Plant cell* 25, 4085-4100.  
Google Scholar: [Author Only](#) [Title Only](#) [Author and Title](#)

Floyd, B.E., Morriss, S.C., MacIntosh, G.C., and Bassham, D.C. (2016). Evidence for autophagy-dependent pathways of rRNA turnover in *Arabidopsis*. *Autophagy* 11, 2199-2212.

Google Scholar: [Author Only](#) [Title Only](#) [Author and Title](#)

Gao, C., Zhuang, X., Shen, J., and Jiang, L. (2017). Plant ESCRT Complexes: Moving Beyond Endosomal Sorting. *Trends Plant Sci* 22, 986-998.

Google Scholar: [Author Only](#) [Title Only](#) [Author and Title](#)

Gao, J., Chaudhary, A., Vaddepalli, P., Nagel, M.K., Isono, E., and Schneitz, K. (2019). The *Arabidopsis* receptor kinase STRUBBELIG undergoes clathrin-dependent endocytosis. *Journal of experimental botany* 70, 3881-3894.

Google Scholar: [Author Only](#) [Title Only](#) [Author and Title](#)

Gretzmeier, C., Eiselein, S., Johnson, G.R., Engelke, R., Nowag, H., Zarei, M., Kuttner, V., Becker, A.C., Rigbolt, K.T.G., Hoyer-Hansen, M., Andersen, J.S., Munz, C., Murphy, R.F., and Dengjel, J. (2017). Degradation of protein translation machinery by amino acid starvation-induced macroautophagy. *Autophagy* 13, 1064-1075.

Google Scholar: [Author Only](#) [Title Only](#) [Author and Title](#)

Hamasaki, M., Noda, T., Baba, M., and Ohsumi, Y. (2005). Starvation triggers the delivery of the endoplasmic reticulum to the vacuole via autophagy in yeast. *Traffic* 6, 56-65.

Google Scholar: [Author Only](#) [Title Only](#) [Author and Title](#)

Han, J., Gagnon, S., Eckle, T., and Borchers, C.H. (2013). Metabolomic analysis of key central carbon metabolism carboxylic acids as their 3-nitrophenylhydrazones by UPLC/ESI-MS. *Electrophoresis* 34, 2891-2900.

Google Scholar: [Author Only](#) [Title Only](#) [Author and Title](#)

Han, S., Wang, Y., Zheng, X., Jia, Q., Zhao, J., Bai, F., Hong, Y., and Liu, Y. (2015). Cytoplasmic Glyceraldehyde-3-Phosphate Dehydrogenases Interact with ATG3 to Negatively Regulate Autophagy and Immunity in *Nicotiana benthamiana*. *The Plant cell* 27, 1316-1331.

Google Scholar: [Author Only](#) [Title Only](#) [Author and Title](#)

Have, M., Luo, J., Tellier, F., Balliau, T., Cueff, G., Chardon, F., Zivy, M., Rajjou, L., Cacas, J.L., and Masclaux-Daubresse, C. (2019). Proteomic and lipidomic analyses of the *Arabidopsis* atg5 autophagy mutant reveal major changes in endoplasmic reticulum and peroxisome metabolisms and in lipid composition. *New Phytol* 223, 1461-1477.

Google Scholar: [Author Only](#) [Title Only](#) [Author and Title](#)

Henry, E., Fung, N., Liu, J., Drakakaki, G., and Coaker, G. (2015). Beyond glycolysis: GAPDHs are multi-functional enzymes involved in regulation of ROS, autophagy, and plant immune responses. *PLoS Genet* 11, e1005199.

Google Scholar: [Author Only](#) [Title Only](#) [Author and Title](#)

Hohner, R., Marques, J.V., Ito, T., Amakura, Y., Budgeon, A.D., Jr., Weitz, K., Hixson, K.K., Davin, L.B., Kirchhoff, H., and Lewis, N.G. (2018). Reduced Arogenate Dehydratase Expression: Ramifications for Photosynthesis and Metabolism. *Plant physiology* 177, 115-131.

Google Scholar: [Author Only](#) [Title Only](#) [Author and Title](#)

Hooper, C.M., Castleden, I.R., Tanz, S.K., Aryamanesh, N., and Millar, A.H. (2017). SUBA4: the interactive data analysis centre for *Arabidopsis* subcellular protein locations. *Nucleic Acids Research* 45, D1064-D1074.

Google Scholar: [Author Only](#) [Title Only](#) [Author and Title](#)

Hooper, C.M., Tanz, S.K., Castleden, I.R., Vacher, M.A., Small, I.D., and Millar, A.H. (2014). SUBAcon: a consensus algorithm for unifying the subcellular localization data of the *Arabidopsis* proteome. *Bioinformatics* 30, 3356-3364.

Google Scholar: [Author Only](#) [Title Only](#) [Author and Title](#)

Huang, X., Zheng, C., Liu, F., Yang, C., Zheng, P., Lu, X., Tian, J., Chung, T., Otegui, M.S., Xiao, S., Gao, C., Vierstra, R.D., and Li, F. (2019). Genetic Analyses of the *Arabidopsis* ATG1 Kinase Complex Reveal Both Kinase-Dependent and Independent Autophagic Routes during Fixed-Carbon Starvation. *The Plant cell* 31, 2973-2995.

Google Scholar: [Author Only](#) [Title Only](#) [Author and Title](#)

Izumi, M., Ishida, H., Nakamura, S., and Hidema, J. (2017). Entire Photodamaged Chloroplasts Are Transported to the Central Vacuole by Autophagy. *The Plant cell* 29, 377-394.

Google Scholar: [Author Only](#) [Title Only](#) [Author and Title](#)

Jiao, L., Zhang, H.L., Li, D.D., Yang, K.L., Tang, J., Li, X., Ji, J., Yu, Y., Wu, R.Y., Ravichandran, S., Liu, J.J., Feng, G.K., Chen, M.S., Zeng, Y.X., Deng, R., and Zhu, X.F. (2017). Regulation of Glycolytic Metabolism by Autophagy in Liver Cancer Involves Selective Autophagic Degradation of HK2 (hexokinase 2). *Autophagy*, 0.

Google Scholar: [Author Only](#) [Title Only](#) [Author and Title](#)

Jung, H., Lee, H.N., Marshall, R.S., Lomax, A.W., Yoon, M.J., Kim, J., Kim, J.H., Vierstra, R.D., Chung, T., and Bozhkov, P. (2020). *Arabidopsis* cargo receptor NBR1 mediates selective autophagy of defective proteins. *Journal of experimental botany* 71, 73-89.

Google Scholar: [Author Only](#) [Title Only](#) [Author and Title](#)

Juntawong, P., Girke, T., Bazin, J., and Bailey-Serres, J. (2014). Translational dynamics revealed by genome-wide profiling of ribosome footprints in *Arabidopsis*. *Proceedings of the National Academy of Sciences of the United States of America* 111, E203-212.

Google Scholar: [Author Only](#) [Title Only](#) [Author and Title](#)

**Kast, D.J., and Dominguez, R. (2017). The Cytoskeleton–Autophagy Connection. *Current Biology* 27, R318-R326.**

Google Scholar: [Author Only Title Only Author and Title](#)

**Khaminets, A, Heinrich, T., Mari, M., Grumati, P., Huebner, A.K., Akutsu, M., Liebmann, L., Stolz, A., Nietzsche, S., Koch, N., Mauthe, M., Katona, I., Qualmann, B., Weis, J., Reggiori, F., Kurth, I., Hubner, C.A., and Dikic, I. (2015). Regulation of endoplasmic reticulum turnover by selective autophagy. *Nature* 522, 354-358.**

Google Scholar: [Author Only Title Only Author and Title](#)

**Lam, S.K., Cai, Y., Tse, Y.C., Wang, J., Law, A.H., Pimpl, P., Chan, H.Y., Xia, J., and Jiang, L. (2009). BFA-induced compartments from the Golgi apparatus and trans-Golgi network/early endosome are distinct in plant cells. *Plant J* 60, 865-881.**

Google Scholar: [Author Only Title Only Author and Title](#)

**Lamesch, P., Berardini, T.Z., Li, D., Swarbreck, D., Wilks, C., Sasidharan, R., Muller, R., Dreher, K., Alexander, D.L., Garcia-Hernandez, M., Karthikeyan, A.S., Lee, C.H., Nelson, W.D., Ploetz, L., Singh, S., Wensel, A., and Huala, E. (2012). The Arabidopsis Information Resource (TAIR): improved gene annotation and new tools. *Nucleic Acids Res* 40, D1202-1210.**

Google Scholar: [Author Only Title Only Author and Title](#)

**Lee, K.C., Chan, W., Liang, Z.T., Liu, N., Zhao, Z.Z., Lee, A.W.M., and Cai, Z.W. (2008). Rapid screening method for intact glucosinolates in Chinese medicinal herbs by using liquid chromatography coupled with electrospray ionization ion trap mass spectrometry in negative ion mode. *Rapid Commun Mass Sp* 22, 2825-2834.**

Google Scholar: [Author Only Title Only Author and Title](#)

**Li, F.Q., and Vierstra, R.D. (2014). Arabidopsis ATG11, a scaffold that links the ATG1-ATG13 kinase complex to general autophagy and selective mitophagy. *Autophagy* 10, 1466-1467.**

Google Scholar: [Author Only Title Only Author and Title](#)

**Li, F.Q., Chung, T., and Vierstra, R.D. (2014). AUTOPHAGY-RELATED11 Plays a Critical Role in General Autophagy- and Senescence-Induced Mitophagy in Arabidopsis. *The Plant cell* 26, 788-807.**

Google Scholar: [Author Only Title Only Author and Title](#)

**Li, L., Nelson, C.J., Trosch, J., Castleden, I., Huang, S., and Millar, A.H. (2017). Protein Degradation Rate in Arabidopsis thaliana Leaf Growth and Development. *Plant Cell* 29, 207-228.**

Google Scholar: [Author Only Title Only Author and Title](#)

**Lin, L.Z., Sun, J.H., Chen, P., Zhang, R.W., Fan, X.E., Li, L.W., and Harnly, J.M. (2014). Profiling of Glucosinolates and Flavonoids in *Rorippa indica* (Linn.) Hiern. (Cruciferae) by UHPLC-PDA-ESI/HRMSn. *J Agr Food Chem* 62, 6118-6129.**

Google Scholar: [Author Only Title Only Author and Title](#)

**Liu, L., Feng, D., Chen, G., Chen, M., Zheng, Q., Song, P., Ma, Q., Zhu, C., Wang, R., Qi, W., Huang, L., Xue, P., Li, B., Wang, X., Jin, H., Wang, J., Yang, F., Liu, P., Zhu, Y., Sui, S., and Chen, Q. (2012a). Mitochondrial outer-membrane protein FUNDC1 mediates hypoxia-induced mitophagy in mammalian cells. *Nat Cell Biol* 14, 177-185.**

Google Scholar: [Author Only Title Only Author and Title](#)

**Liu, Y., Burgos, J.S., Deng, Y., Srivastava, R., Howell, S.H., and Bassham, D.C. (2012b). Degradation of the endoplasmic reticulum by autophagy during endoplasmic reticulum stress in Arabidopsis. *The Plant cell* 24, 4635-4651.**

Google Scholar: [Author Only Title Only Author and Title](#)

**Macharia, M.W., Tan, W.Y.Z., Das, P.P., Naqvi, N.I., and Wong, S.M. (2019). Proximity-dependent biotinylation screening identifies NbHYPK as a novel interacting partner of ATG8 in plants. *BMC Plant Biol* 19, 326.**

Google Scholar: [Author Only Title Only Author and Title](#)

**Mackeh, R., Perdiz, D., Lorin, S., Codogno, P., and Pous, C. (2013). Autophagy and microtubules - new story, old players. *J Cell Sci* 126, 1071-1080.**

Google Scholar: [Author Only Title Only Author and Title](#)

**Marshall, R.S., and Vierstra, R.D. (2018). Autophagy: The Master of Bulk and Selective Recycling. *Annu Rev Plant Biol* 69, 173-208.**

Google Scholar: [Author Only Title Only Author and Title](#)

**Marshall, R.S., Li, F., Gemperline, D.C., Book, A.J., and Vierstra, R.D. (2015). Autophagic Degradation of the 26S Proteasome Is Mediated by the Dual ATG8/Ubiquitin Receptor RPN10 in Arabidopsis. *Molecular cell* 58, 1053-1066.**

Google Scholar: [Author Only Title Only Author and Title](#)

**Marty, F. (1999). Plant vacuoles. *The Plant cell* 11, 587-600.**

Google Scholar: [Author Only Title Only Author and Title](#)

**Masclaux-Daubresse, C., Clement, G., Anne, P., Routaboul, J.M., Guiboileau, A., Soulay, F., Shirasu, K., and Yoshimoto, K. (2014). Stitching together the Multiple Dimensions of Autophagy Using Metabolomics and Transcriptomics Reveals Impacts on Metabolism, Development, and Plant Responses to the Environment in Arabidopsis. *The Plant cell* 26, 1857-1877.**

Google Scholar: [Author Only Title Only Author and Title](#)

**Matsuda, F., Yonekura-Sakakibara, K., Niida, R., Kuromori, T., Shinozaki, K., and Saito, K. (2009). MS/MS spectral tag-based annotation of non-targeted profile of plant secondary metabolites. *Plant Journal* 57, 555-577.**

Google Scholar: [Author Only Title Only Author and Title](#)



McLoughlin, F., Augustine, R.C., Marshall, R.S., Li, F., Kirkpatrick, L.D., Otegui, M.S., and Vierstra, R.D. (2018). Maize multi-omics reveal roles for autophagic recycling in proteome remodelling and lipid turnover. *Nat Plants*.

Google Scholar: [Author Only](#) [Title Only](#) [Author and Title](#)

McLoughlin, F., Marshall, R.S., Ding, X., Chatt, E.C., Kirkpatrick, L.D., Augustine, R.C., Li, F., Otegui, M.S., and Vierstra, R.D. (2020). Autophagy Plays Prominent Roles in Amino Acid, Nucleotide, and Carbohydrate Metabolism during Fixed-Carbon Starvation in Maize. *The Plant cell* 32, 2699-2724.

Google Scholar: [Author Only](#) [Title Only](#) [Author and Title](#)

McWhite, C.D., Papoulas, O., Drew, K., Cox, R.M., June, V., Dong, O.X., Kwon, T., Wan, C., Salmi, M.L., Roux, S.J., Browning, K.S., Chen, Z.J., Ronald, P.C., and Marcotte, E.M. (2020). A Pan-plant Protein Complex Map Reveals Deep Conservation and Novel Assemblies. *Cell* 181, 460-474.e414.

Google Scholar: [Author Only](#) [Title Only](#) [Author and Title](#)

Monastyrska, I., Rieter, E., Klionsky, D.J., and Reggiori, F. (2009). Multiple roles of the cytoskeleton in autophagy. *Biol Rev Camb Philos Soc* 84, 431-448.

Google Scholar: [Author Only](#) [Title Only](#) [Author and Title](#)

Naumann, C., Muller, J., Sakhonwasee, S., Wiegand, A., Hause, G., Heisters, M., Burstenbinder, K., and Abel, S. (2019). The Local Phosphate Deficiency Response Activates Endoplasmic Reticulum Stress-Dependent Autophagy. *Plant physiology* 179, 460-476.

Google Scholar: [Author Only](#) [Title Only](#) [Author and Title](#)

Nebenfuhr, A., Ritzenthaler, C., and Robinson, D.G. (2002). Brefeldin A: deciphering an enigmatic inhibitor of secretion. *Plant physiology* 130, 1102-1108.

Google Scholar: [Author Only](#) [Title Only](#) [Author and Title](#)

Nelson, C.J., Alexova, R., Jacoby, R.P., and Millar, A.H. (2014). Proteins with high turnover rate in barley leaves estimated by proteome analysis combined with in planta isotope labeling. *Plant physiology* 166, 91-108.

Google Scholar: [Author Only](#) [Title Only](#) [Author and Title](#)

Nesvizhskii, A.I., Keller, A., Kolker, E., and Aebersold, R. (2003). A statistical model for identifying proteins by tandem mass spectrometry. *Anal Chem* 75, 4646-4658.

Google Scholar: [Author Only](#) [Title Only](#) [Author and Title](#)

Otegui, M.S. (2018). Vacuolar degradation of chloroplast components: autophagy and beyond. *Journal of experimental botany* 69, 741-750.

Google Scholar: [Author Only](#) [Title Only](#) [Author and Title](#)

Pavel, M., Imarisio, S., Menzies, F.M., Jimenez-Sanchez, M., Siddiqi, F.H., Wu, X., Renna, M., O'Kane, C.J., Crowther, D.C., and Rubinsztein, D.C. (2016). CCT complex restricts neuropathogenic protein aggregation via autophagy. *Nature communications* 7, 13821.

Google Scholar: [Author Only](#) [Title Only](#) [Author and Title](#)

Pereira, C., Pereira, S., and Pissarra, J. (2014). Delivering of proteins to the plant vacuole--an update. *Int J Mol Sci* 15, 7611-7623.

Google Scholar: [Author Only](#) [Title Only](#) [Author and Title](#)

Qian, X., Li, X., and Lu, Z. (2017a). Protein kinase activity of the glycolytic enzyme PGK1 regulates autophagy to promote tumorigenesis. *Autophagy* 13, 1246-1247.

Google Scholar: [Author Only](#) [Title Only](#) [Author and Title](#)

Qian, X., Li, X.J., Cai, Q.S., Zhang, C.B., Yu, Q.J., Jiang, Y.H., Lee, J.H., Hawke, D., Wang, Y.G., Xia, Y., Zheng, Y., Jiang, B.H., Liu, D.X., Jiang, T., and Lu, Z.M. (2017b). Phosphoglycerate Kinase 1 Phosphorylates Beclin1 to Induce Autophagy. *Molecular cell* 65, 917-+.

Google Scholar: [Author Only](#) [Title Only](#) [Author and Title](#)

Razi, M., Chan, E.Y., and Tooze, S.A. (2009). Early endosomes and endosomal coatamer are required for autophagy. *J Cell Biol* 185, 305-321.

Google Scholar: [Author Only](#) [Title Only](#) [Author and Title](#)

Reggiori, F., Monastyrska, I., Shintani, T., and Klionsky, D.J. (2005). The actin cytoskeleton is required for selective types of autophagy, but not nonspecific autophagy, in the yeast *Saccharomyces cerevisiae*. *Mol Biol Cell* 16, 5843-5856.

Google Scholar: [Author Only](#) [Title Only](#) [Author and Title](#)

Rochfort, S.J., Trenerry, V.C., Imsic, M., Panozzo, J., and Jones, R. (2008). Class targeted metabolomics: ESI ion trap screening methods for glucosinolates based on MSn fragmentation. *Phytochemistry* 69, 1671-1679.

Google Scholar: [Author Only](#) [Title Only](#) [Author and Title](#)

Schindelin, J., Arganda-Carreras, I., Frise, E., Kaynig, V., Longair, M., Pietzsch, T., Preibisch, S., Rueden, C., Saalfeld, S., Schmid, B., Tinevez, J.Y., White, D.J., Hartenstein, V., Eliceiri, K., Tomancak, P., and Cardona, A. (2012). Fiji: an open-source platform for biological-image analysis. *Nat Methods* 9, 676-682.

Google Scholar: [Author Only](#) [Title Only](#) [Author and Title](#)

Shimada, T., Takagi, J., Ichino, T., Shirakawa, M., and Hara-Nishimura, I. (2018). Plant Vacuoles. *Annu Rev Plant Biol* 69, 123-145.

Google Scholar: [Author Only](#) [Title Only](#) [Author and Title](#)

Shteynberg, D., Deutsch, E.W., Lam, H., Eng, J.K., Sun, Z., Tasman, N., Mendoza, L., Moritz, R.L., Aebersold, R., and Nesvizhskii, A.I. (2011). iProphet: multi-level integrative analysis of shotgun proteomic data improves peptide and protein identification rates and error estimates. *Molecular & cellular proteomics* : MCP 10, M111 007690.

Google Scholar: [Author Only](#) [Title Only](#) [Author and Title](#)

Stobiecki, M., Skiryecz, A., Kerhoas, L., Kachlicki, P., Muth, D., Einhorn, J., and Mueller-Roeber, B. (2006). Profiling of phenolic glycosidic conjugates in leaves of *Arabidopsis thaliana* using LC/MS. *Metabolomics* 2, 197-219.

Google Scholar: [Author Only](#) [Title Only](#) [Author and Title](#)

Styers, M.L., O'Connor, A.K., Grabski, R., Cormet-Boyaka, E., and Sztul, E. (2008). Depletion of beta-COP reveals a role for COP-I in compartmentalization of secretory compartments and in biosynthetic transport of caveolin-1. *Am J Physiol Cell Physiol* 294, C1485-1498.

Google Scholar: [Author Only](#) [Title Only](#) [Author and Title](#)

Sugiyama, R., and Hirai, M.Y. (2019). Atypical Myrosinase as a Mediator of Glucosinolate Functions in Plants. *Frontiers in plant science* 10.

Google Scholar: [Author Only](#) [Title Only](#) [Author and Title](#)

Tasaki, M., Asatsuma, S., and Matsuoka, K. (2014). Monitoring protein turnover during phosphate starvation-dependent autophagic degradation using a photoconvertible fluorescent protein aggregate in tobacco BY-2 cells. *Frontiers in plant science* 5, 172.

Google Scholar: [Author Only](#) [Title Only](#) [Author and Title](#)

Thompson, A.R., Doelling, J.H., Suttangkakul, A., and Vierstra, R.D. (2005). Autophagic nutrient recycling in *Arabidopsis* directed by the ATG8 and ATG12 conjugation pathways. *Plant physiology* 138, 2097-2110.

Google Scholar: [Author Only](#) [Title Only](#) [Author and Title](#)

Thormahlen, I., Zupok, A., Rescher, J., Leger, J., Weissenberger, S., Groysman, J., Orwat, A., Chatel-Innocenti, G., Issakidis-Bourguet, E., Armbruster, U., and Geigenberger, P. (2017). Thioredoxins Play a Crucial Role in Dynamic Acclimation of Photosynthesis in Fluctuating Light. *Mol Plant* 10, 168-182.

Google Scholar: [Author Only](#) [Title Only](#) [Author and Title](#)

Vandesompele, J., De Preter, K., Pattyn, F., Poppe, B., Van Roy, N., De Paepe, A., and Speleman, F. (2002). Accurate normalization of real-time quantitative RT-PCR data by geometric averaging of multiple internal control genes. *Genome Biol* 3, RESEARCH0034.

Google Scholar: [Author Only](#) [Title Only](#) [Author and Title](#)

Vincow, E.S., Thomas, R.E., Merrihew, G.E., Shulman, N.J., Bammler, T.K., MacDonald, J.W., MacCoss, M.J., and Pallanck, L.J. (2019). Autophagy accounts for approximately one-third of mitochondrial protein turnover and is protein selective. *Autophagy* 15, 1592-1605.

Google Scholar: [Author Only](#) [Title Only](#) [Author and Title](#)

Wang, J., Zhang, J., Lee, Y.M., Koh, P.L., Ng, S., Bao, F., Lin, Q., and Shen, H.M. (2016). Quantitative chemical proteomics profiling of de novo protein synthesis during starvation-mediated autophagy. *Autophagy* 12, 1931-1944.

Google Scholar: [Author Only](#) [Title Only](#) [Author and Title](#)

Wang, S., Xie, K., Xu, G., Zhou, H., Guo, Q., Wu, J., Liao, Z., Liu, N., Wang, Y., and Liu, Y. (2018). Plant G proteins interact with endoplasmic reticulum luminal protein receptors to regulate endoplasmic reticulum retrieval. *J Integr Plant Biol* 60, 541-561.

Google Scholar: [Author Only](#) [Title Only](#) [Author and Title](#)

Waters, M.T., Nelson, D.C., Scaffidi, A., Flematti, G.R., Sun, Y.K., Dixon, K.W., and Smith, S.M. (2012). Specialisation within the DWARF14 protein family confers distinct responses to karrikins and strigolactones in *Arabidopsis*. *Development* 139, 1285-1295.

Google Scholar: [Author Only](#) [Title Only](#) [Author and Title](#)

Watson, A.S., Riffelmacher, T., Stranks, A., Williams, O., De Boer, J., Cain, K., MacFarlane, M., McGouran, J., Kessler, B., Khandwala, S., Chowdhury, O., Puleston, D., Phadwal, K., Mortensen, M., Ferguson, D., Soilleux, E., Woll, P., Jacobsen, S.E., and Simon, A.K. (2015). Autophagy limits proliferation and glycolytic metabolism in acute myeloid leukemia. *Cell Death Discov* 1.

Google Scholar: [Author Only](#) [Title Only](#) [Author and Title](#)

Wijerathna-Yapa, A., Stroehrer, E., Fenske, R., Li, L., Duncan, O., and Millar, A.H. (2021). Proteomics for Autophagy Receptor and Cargo Identification in Plants. *J Proteome Res* 20, 129-138.

Google Scholar: [Author Only](#) [Title Only](#) [Author and Title](#)

Xiong, Y., Contento, A.L., and Bassham, D.C. (2005). AtATG18a is required for the formation of autophagosomes during nutrient stress and senescence in *Arabidopsis thaliana*. *Plant J* 42, 535-546.

Google Scholar: [Author Only](#) [Title Only](#) [Author and Title](#)

Xu, J., Kozlov, G., McPherson, P.S., and Gehring, K. (2018). A PH-like domain of the Rab12 guanine nucleotide exchange factor DENND3 binds actin and is required for autophagy. *J Biol Chem* 293, 4566-4574.

Google Scholar: [Author Only](#) [Title Only](#) [Author and Title](#)

Yokota, H., Gomi, K., and Shintani, T. (2017). Induction of autophagy by phosphate starvation in an Atg11-dependent manner in *Saccharomyces cerevisiae*. *Biochem Biophys Res Commun* 483, 522-527.

Google Scholar: [Author Only](#) [Title Only](#) [Author and Title](#)

Yoshimoto, K., Ishida, H., Wada, S., Ohsumi, Y., and Shirasu, K. (2009a). The role of plant autophagy in nutrient starvation and aging. *Autophagy* 5, 904-904.

Google Scholar: [Author Only](#) [Title Only](#) [Author and Title](#)

**Yoshimoto, K., Jikumaru, Y., Kamiya, Y., Kusano, M., Consonni, C., Panstruga, R., Ohsumi, Y., and Shirasu, K. (2009b). Autophagy negatively regulates cell death by controlling NPR1-dependent salicylic acid signaling during senescence and the innate immune response in Arabidopsis. The Plant cell 21, 2914-2927.**

Google Scholar: [Author Only](#) [Title Only](#) [Author and Title](#)

**Zhang, C., Hicks, G.R., and Raikhel, N.V. (2014). Plant vacuole morphology and vacuolar trafficking. Frontiers in plant science 5.**

Google Scholar: [Author Only](#) [Title Only](#) [Author and Title](#)

**Zhang, K., Halitschke, R., Yin, C., Liu, C.J., and Gan, S.S. (2013). Salicylic acid 3-hydroxylase regulates Arabidopsis leaf longevity by mediating salicylic acid catabolism. Proc Natl Acad Sci U S A 110, 14807-14812.**

Google Scholar: [Author Only](#) [Title Only](#) [Author and Title](#)

**Zhang, T., Shen, S., Qu, J., and Ghaemmaghani, S. (2016). Global Analysis of Cellular Protein Flux Quantifies the Selectivity of Basal Autophagy. Cell Reports 14, 2426-2439.**

Google Scholar: [Author Only](#) [Title Only](#) [Author and Title](#)

**Zhang, X., Ding, X., Marshall, R.S., Paez-Valencia, J., Lacey, P., Vierstra, R.D., and Otegui, M.S. (2020). Reticulon proteins modulate autophagy of the endoplasmic reticulum in maize endosperm. Elife 9.**

Google Scholar: [Author Only](#) [Title Only](#) [Author and Title](#)

**Zheng, X., Wu, M., Li, X., Cao, J., Li, J., Wang, J., Huang, S., Liu, Y., and Wang, Y. (2019). Actin filaments are dispensable for bulk autophagy in plants. Autophagy 15, 2126-2141.**

Google Scholar: [Author Only](#) [Title Only](#) [Author and Title](#)

**Zhuang, X., and Jiang, L. (2019). Chloroplast Degradation: Multiple Routes Into the Vacuole. Frontiers in plant science 10, 359.**

Google Scholar: [Author Only](#) [Title Only](#) [Author and Title](#)
